# Supplementary material for: Cell type-specific driver lines targeting the Drosophila central complex and their use to investigate neuropeptide expression and sleep regulation
Source: eLife. 2025 Apr 17;14:RP104764. doi: 10.7554/eLife.104764 (PMC12005719; doi:10.7554/eLife.104764)
Supplement: Figure 2—source data 1. [file elife-104764-fig2-data1.xlsx]

## Sheet: Sheet1
Structure	Cell type	Cell type long name	GAL4 line number	EM body IDs from hemibrain	Parents	Comments	Cell type annotation notes	Literature citation
PB	PFNp+m	PBG2-9.s-FBl1.b-NO3P.b/PBG2-9.s-FBl1.b-NO3M.b	SS52244		BJD_111B06_BB_21-x-GMR_48A11_AV_01	Minor VNC exp	§	Wolff & Rubin 2018
			SS00191		GMR_38G07_XA_21-x-GMR_37H01_XD_01	Minor VNC exp	§	Wolff & Rubin 2018
PB	PFNa	PBG2-9.s-FBl2.b-NO3A.b	SS02255	601216096, 880526477	GMR_38G07_XA_21-x-GMR_37H01_XD_01	Rare VNC exp	§	Wolff & Rubin 2018
			SS00043		GMR_65B12_XA_21-x-GMR_30E10_XD_01	Minor VNC exp	§	Wolff & Rubin 2018
PB	PFNd	PBG2-9.s-FBl3.b-NO2D.b	SS52669	758065781, 819138239	GMR_68A10_BB_21-x-GMR_75H10_XD_01		§	Wolff & Rubin 2018
			SS00078		GMR_16D01_XA_21-x-GMR_15E01_AV_01		§	Wolff & Rubin 2018
PB	PFNv	PBG2-9.s-FBl3.b-NO2V.b	SS52577	601557317, 911897818	BJD_109C02_BB_21-x-BJD_126C06_AV_01		§	Wolff & Rubin 2018
			SS53161		BJD_109C02_BB_21-x-BJD_105F11_AV_01		§	Wolff & Rubin 2018
PB	PEN_a(PEN1)	PBG2-9.s-EBt.b-NO1.b	SS62862	634608104, 1127471692	BJD_125D06_BB_21-x-GMR_37F06_AV_01	Plus NO2 ct; sparse VNC exp	§	Turner-Evans 2020
PB	PEN_b(PEN2)		SS54295	5813047157, 879183317	BJD_126F12_BB_21-x-BJD_107H03_AV_01		§	Wolff & Rubin 2018
			SS02232		BJD_120E09_BB_21-x-BJD_105A04_AV_01	Some non-CX cts; sparse VNC exp	§	Turner-Evans 2020
PB	PEG	PBG1-9.s-EBt.b-D/V GA.b	SS02191	942587380, 881898734	BJD_100A02_BB_21-x-BJD_108B12_AV_01	VNC exp	§	Wolff & Rubin 2018
			SS27853		GMR_33A12_BB_37-x-BJD_108B12_AV_01	Non-CX cts, VNC exp	§	Wolff & Rubin 2018
PB	EPG	PBG1-8.b-EBw.s-D/V GA.b	SS00090	697001770, 1127476096	GMR_19G02_XA_21-x-GMR_15C03_XD_01		§	Wolff & Rubin 2018
			SS00098		GMR_19G02_XA_21-x-GMR_93G12_XD_01	Sparse VNC exp	§	Wolff & Rubin 2018
PB	PEcG	PBG1-9.s-EBc.b-D/V GA.b	SS02195	EM analog not identified	BJD_100A02_BB_21-x-GMR_47A08_XD_01	Minor VNC exp	§	Wolff & Rubin 2018
			SS56252		GMR_38B06_XA_21-x-BJD_115C10_AV_01	Plus CX ct; minor VNC exp	§	this study
PB	EPGt	PBG9.b-EB.P.s-GA-t.b	SS50576	1219069439, 1168664447	BJD_113B09_BB_21-x-GMR_65H10_AV_01	Some VNC exp	§	Wolff & Rubin 2018
			SS02254		GMR_15E01_XA_21-x-BJD_103H04_AV_01	Non-CX cts; VNC exp	§	Wolff & Rubin 2018
PB	PFGs	PB.s-FBl6.b.l3.s-VGA-s.b	SS52547	788461444, 1189891402	BJD_100A02_BB_21-x-BJD_119A12_AV_01	Some VNC exp	§	this study
			SS77032		BJD_115C08_BB_21-x-BJD_100F11_AV_01	†	§	this study
			SS62596		BJD_106E02_BB_37-x-GMR_21E02_AV_01			this study
			SS20046		BJD_100A02_BB_21-x-GMR_21E02_AV_01			Wolff & Rubin 2018
			SS52590		BJD_113B09_BB_21-x-BJD_100A02_AV_01			Wolff & Rubin 2018
PB	PFR_a	PBG1-8.s-FBl3,4,5.s.b-ROB.b	SS02270	727376283, 1072844208	GMR_30G06_XA_21-x-GMR_27A10_XD_01	_a based on CB#; could be _a and _b if incomplete expression; OL exp	§	Wolff & Rubin 2018
			SS02293		GMR_41G11_XA_21-x-BJD_106E02_AV_01	_a and _b based on CB#; minor VNC exp	§	Wolff & Rubin 2018
PB	PFR_b	PBG1-8.s-FBl3,4,5.s.b-ROB.b	SS54549	1066420480, 819828716	GMR_38B06_XA_21-x-BJD_126G08_AV_01	_b based on CB#, though could be incomplete expression		Wolff & Rubin 2018
			SS02293		GMR_41G11_XA_21-x-BJD_106E02_AV_01	_a and _b based on CB#; minor VNC exp		this study
PB	PFL1/PFLC	PBG1-7.s-FBl2.s-LAL.b-CRE.b	SS100561	911578483, 911565319	GMR_35A11_BB_21-x-BJD_137B07_AV_01	†	§	this study
			SS47735		GMR_11B11_BB_21-x-GMR_23G11_AV_01	†	§	this study
PB	PFL2	PB1-4FB1,2,4,5LAL	SS82329	850194651, 481112669	BJD_105C05_BB_21-x-GMR_14H09_AV_01	Plus CX ct; some VNC exp; †	§	this study
			SS82331		BJD_105C05_BB_21-x-GMR_33A12_AV_01	Plus CX ct; some VNC exp; †	§; §§§	this study
			SS60291		BJD_122B08_BB_21-x-GMR_30G06_AV_01	LAL arbor indicates PFL2 or PFL3 or both; †	§	this study
			[SS82330]		BJD_105C05_BB_21-x-BJD_128A05_AV_01	Likely PFL2&3; †	§	this study
PB	PFL3	PB1-7FB1,2,4,5LAL	SS82335	911569552, 789130596	BJD_128A05_BB_21-x-GMR_33A12_AV_01	Can't rule out also PFL2; plus CX ct; minor VNC exp	§	this study
			SS60291		BJD_122B08_BB_21-x-GMR_30G06_AV_01	LAL arbor indicates PFL2 or PFL3 or both; †	§	this study
			[SS00135]		GMR_30G06_XA_21-x-GMR_13D09_XD_01		§	this study
			[SS82330]		BJD_105C05_BB_21-x-BJD_128A05_AV_01	Likely PFL2&3; †	§	this study
PB	LPsP	PB.b-LAL.s-PS.s	SS52578	1095275456, 881217171	BJD_110F01_BB_21-x-BJD_101G02_AV_01		§	Wolff & Rubin 2018
			SS52684		GMR_89G08_BB_21-x-BJD_113C04_AV_01	Minimal non-CX and VNC exp	§	this study
PB	P6-8P9	PBG6-8.sG9.b	SS00118	972513129, 5813058389	GMR_24A02_XA_21-x-GMR_30G06_XD_01	Sparse VNC exp	§	this study
			SS00189		GMR_38G07_XA_21-x-GMR_18G01_XD_01	Minimal non-CX and VNC exp	§	this study
PB	Delta7	PB18.s-GxΔ7Gy.b/PB18.s-9i1i8c.b	SS52313	911129204, 880530613	GMR_45G06_XA_21-x-GMR_25D01_AV_01		§	Wolff & Rubin 2018
			SS52257		BJD_121E12_BB_21-x-GMR_24A02_AV_01	Sparse VNC exp	§	Wolff & Rubin 2018
PB	P1-9	PBG1/2-9.b-SPSi.s	SS00153	911565408, 941469301	GMR_37H01_XA_21-x-GMR_38G02_XD_01	Some VNC exp	§	this study
			SS56247		BJD_122F02_BB_21-x-BJD_122C09_AV_01	Sparse VNC exp	§	this study
PB	IbSpsP	PBG2-9.b-IB.s.SPS.s	SS04778	941814244, 941831818	GMR_47G08_BB_21-x-BJD_109G05_AV_01		§	Wolff & Rubin 2018
			SS03951		GMR_47G08_BB_21-x-GMR_44A02_AV_01		§	this study
NO	GLNO (was LG-N)	LAL.s-GAi.s-NO1i.b	SS46517	1600420555, 1539994995	BJD_115B11_BB_21-x-BJD_120E12_AV_01		§	Wolff & Rubin 2018
			SS47436		GMR_12G04_XA_21-x-BJD_128B05_AV_01	Some non-CX exp	§	Wolff & Rubin 2018
NO	LNOa (was L-NA)	LAL.s-NO3Ai.b	SS47406	1508956088, 1539788837	BJD_115B11_BB_21-x-BJD_110C07_AV_01		§	Wolff & Rubin 2018
			SS63502		BJD_105H12_BB_57-x-BJD_110C07_AV_01		§	this study
			SS47432		BJD_128B05_BB_21-x-BJD_110C07_AV_01			Wolff & Rubin 2018
NO	LCNOpm	LAL.s-CREi.s-NO3P/Mi.b	SS47384	1540129092, 1513363614	BJD_111G03_BB_21-x-BJD_115C01_AV_01		§	Wolff & Rubin 2018
			SS47358		BJD_101F10_BB_21-x-BJD_115B11_AV_01	IS≠SS, alt is SS42273 (BJD_115C01_BB_21-x-GMR_83B02_XD_01)	§	this study
			SS92647		BJD_115B11_BB_21-x-BJD_115C01_AV_01	LCNOpm weak; plus FB4G; †	§	this study
			SS42273		BJD_115C01_BB_21-x-GMR_83B02_XD_01			this study
NO	LCNOp/ LCNp	LAL.s-CREc.s-NO3Pc.b	SS46525	1268568859, 1568711739	BJD_116C06_BB_21-x-BJD_125B02_AV_01	Occ weak exp in FB cell; variable exp in CNS and VNC	§	Wolff & Rubin 2018
			SS46529		BJD_118C01_BB_21-x-BJD_115B11_AV_01	Non-CX and minor VNC exp	§	this study
NO	LNO1 (was L-N)	LAL.s-NO1i.b	SS47398	1511032500, 1450318227	BJD_113C06_BB_21-x-BJD_100H07_AV_01	Some non-CX and VNC exp	§	Wolff & Rubin 2018
			SS95213		BJD_105D03_BB_21-x-BJD_100C04_AV_01	Minor non-CX and VNC exp; †	§	this study
NO	LNO2		SS90977	1509435552, 1448575109	BJD_105D03_BB_21-x-BJD_112E12_AV_01	Minor VNC exp; †	§	this study
			SS83782		BJD_112E12_BB_21-x-BJD_115B09_AV_01	Non-CX cts; some VNC exp; †	§	this study
NO	LNO3		BJD_114D08	1326264840		GAL4 line; only line identified for LNO3	§
AB	vDeltaA_a	AB-FBl8 /AF	SS50447	885943588, 911220341	BJD_119G09_BB_21-x-BJD_100D11_AV_01	Rare v∆A_b in MCFO; sparse VNC exp	§	Wolff & Rubin 2018
			SS02718		BJD_103D04_BB_21-x-GMR_83D12_AV_01	Occasional v∆A_b in MCFO	§	Wolff & Rubin 2018
AB	SAF	SLP-AB-FBl8	SS50419	296497316, 388246273	BJD_107B07_BB_21-x-BJD_123E11_AV_01	Variable non-CX exp; sparse VNC exp	§	this study
			SS68681		BJD_107B07_BB_21-x-GMR_46H07_AV_01	Plus non-CX ct; minor VNC exp; †	§	this study
			SS68682		BJD_110B04_BB_21-x-GMR_46H07_AV_01	_I5: FB1J; _I6: SAF, so likely both cts	§	this study
AB	SA1_a	SLP.s-ABi.b	SS50502	295819960, 294450495	GMR_26C06_XA_21-x-GMR_72A10_AV_01	SA1, SA2, SA3 are 3 forms of SLP-AB. SS50502 includes SA1, SA2, SA3	§	Wolff & Rubin 2018
	SA1_b	SLP.s-ABi.b	SS50510	295474876, 888598546	GMR_42C09_XA_21-x-BJD_122E10_AV_01	SS50510 includes SA1, SA2, SA3	§	Wolff & Rubin 2018
FB	hDeltaA	FB4D5FB4	SS64464	634595283, 1163185997	BJD_119E05_BB_21-x-BJD_123F06_AV_01	†	§	this study
			SS82789		BJD_116F08_BB_21-x-GMR_86B06_AV_01	†	§	this study
FB	hDeltaB	FB3,4vD5FB3,4v	SS64527	1384277275, 1192606191	BJD_110C09_BB_21-x-GMR_29A11_AV_01		§	this study
			SS63915		BJD_111B06_BB_21-x-BJD_127E12_AV_01	CB # right, signature dorsal spurs for h∆B	§	this study
			SS64521		BJD_115D05_BB_21-x-GMR_70G12_AV_01			this study
FB	hDeltaC	FB2,6D7FB6	SS96938	941141029, 915623433	GMR_68A10_BB_21-x-GMR_14F05_AV_01	†	§	this study
			SS102081		GMR_14F05_BB_03-x-GMR_19G02_AV_01	†	§	this study
FB	hDeltaD	FB1,8D3FB8	SS65202	886276864, 388012215	GMR_14C07_BB_04-x-GMR_9D11_AV_01	†	§	this study
			SS00045		GMR_72G03_XA_21-x-GMR_14C07_XD_01	Minor VNC	§	this study
			SS64505		BJD_115D05_BB_21-x-GMR_43D09_AV_01			this study
FB	hDeltaE	FB1,7D3FB7	SS90984	948333576, 916651038	BJD_114H05_BB_21-x-BJD_125D12_AV_01	†	§	this study
			SS54689		GMR_72G03_BB_21-x-GMR_11D02_AV_01	Couple MCFO show off-target expression	§	this study
FB	hDeltaF	FB1,6d,7D2FB6,7	SS63121	886280796, 1166885674	BJD_111B06_BB_21-x-BJD_119E05_AV_01		§	this study
			SS53683		GMR_91D10_XA_21-x-GMR_56E07_AV_01		§	this study
			SS54903		GMR_91D10_XA_21-x-BJD_113C10_AV_01			this study
			SS63959		GMR_24E05_BB_04-x-GMR_91D10_AV_01			this study
			SS00291		GMR_91D10_XA_21-x-GMR_89G01_XD_01			this study
FB	hDeltaG	FB2,3,5d6vD3FB6v	SS65888	1035942041, 915943091	GMR_43D09_BB_04-x-BJD_108B12_AV_01	Also h∆H; minor non-CX; †	§	this study
			SS85319		GMR_43D09_BB_04-x-GMR_45F12_AV_01	Plus h∆ ct	§	this study
FB	hDeltaH	FB2d,4D3FB5	SS92512	849745643, 1039404729	BJD_121A12_BB_21-x-GMR_91A01_AV_01		§	this study
			SS91776		BJD_107H01_BB_21-x-GMR_19E06_AV_01	Some VNC exp	§	this study
			SS65888		GMR_43D09_BB_04-x-BJD_108B12_AV_01	Also h∆G minor non-CX; †	§	this study
			SS60474		BJD_112H02_BB_21-x-GMR_91A01_AV_01			this study
FB	hDeltaI	FB2,3,4,5D5FB4,5v	SS65342	1194558092, 1225251556	GMR_19E06_BB_21-x-GMR_72C10_AV_01	Minor VNC; CB#, anatomy best fit h∆I; 1 image >fit h∆J	§	this study
			SS60919		GMR_72G03_BB_21-x-BJD_107F12_AV_01		§	this study
			SS63547		BJD_108C05_BB_21-x-BJD_114H01_AV_01			this study
FB	hDeltaJ	FB1,2,3,4D5FB4,5	SS91768	1196673506, 1322189987	BJD_123H07_BB_21-x-BJD_114H01_AV_01	Best fit though CB# ~half total; †	§	this study
FB	hDeltaK	EBFB3,4D5FB6	SS63089	571140165, 1134167069	BJD_100G03_BB_21-x-BJD_111B06_AV_01		§	this study
			SS63158		BJD_124A03_BB_21-x-BJD_108A01_AV_01	†	§	this study
			SS54676		GMR_72G03_BB_21-x-BJD_111B06_AV_01	†		this study
			SS59410		BJD_124A03_BB_21-x-GMR_71F03_AV_01	†		this study
			SS59455		GMR_87D07_BB_21-x-BJD_119E10_AV_01			this study
FB	hDeltaL	FB2,6D5FB6d	SS96918	915606051, 850760107	BJD_114H05_BB_21-x-BJD_115D05_AV_01	†	§	this study
			SS60415		BJD_108H03_BB_21-x-GMR_72G07_AV_01	non-CX, OL & VNC exp; †	§	this study
FB	hDeltaM	FB2,4D3FB5	SS59766	941127873, 1070098366	GMR_54H04_BB_21-x-BJD_107H01_AV_01		§	this study
			SS65922		GMR_75B10_BB_21-x-BJD_117G02_AV_01	†	§	this study
FB	vDeltaA_b	FB1D0FB8	SS84332	881152299, 979709436	GMR_72G07_BB_04-x-BJD_124H01_AV_01			this study
			SS02718		BJD_103D04_BB_21-x-GMR_83D12_AV_01			this study
FB	vDeltaB	FB1D0FB7_1	SS84333	885603529, 947349354	GMR_76E09_XA_21-x-BJD_124H01_AV_01	†	§	this study
			SS82796		GMR_28C06_XA_21-x-GMR_23B09_XD_01	Minor non-CX and VNC exp	§	this study
			SS00266		GMR_72G03_XA_21-x-GMR_70H05_XD_01			this study
FB	vDeltaC	FB1D0FB7_2	SS00268	916992347, 912191317	GMR_72G03_XA_21-x-GMR_76E07_XD_01	Plus non-CX ct	§	this study
			SS02953		GMR_52C05_BB_21-x-GMR_72G07_AV_01	Plus non-CX ct; VNC exp	§	this study
FB	vDeltaD	FB1D0FB6	SS60482	1310822912, 915610218	GMR_72G07_BB_04-x-GMR_74H07_AV_01	Plus v∆C?&v∆E?	§	this study
			SS02951		GMR_33C05_XA_21_BX3G_1500005-x-GMR_76E07_AV_01	v∆D and v∆E; minor VNC exp	§	this study
FB	vDeltaE	FB1,2,3D0FB6v	SS02951	978682042, 880202324	GMR_33C05_XA_21_BX3G_1500005-x-GMR_76E07_AV_01	v∆D and v∆E; minor VNC exp	§	this study
			SS82718		BJD_120G10_BB_21-x-BJD_125C08_AV_01	v∆E best fit morph. and CB#; unlikely v∆F/G; plust non_CX ct; some VNC exp; †	§	this study
FB	vDeltaF	FB1,2,3D0FB5d	SS82784	1070443716, 1322531033	GMR_38B08_BB_21-x-GMR_72G07_AV_01	Most likely v∆F+v∆G; plus non-CX, VNC exp	§	this study
			SS60428		BJD_110E08_BB_21-x-BJD_108A01_AV_01	v∆F, v∆G,v∆J (B5 shows v∆F)	§	this study
FB	vDeltaG	FB1,2D0FB5d	SS82784	1008041810, 5813075613	GMR_38B08_BB_21-x-GMR_72G07_AV_01	Most likely v∆F+v∆G; plus non-CX, VNC exp	§	this study
			SS60428		BJD_110E08_BB_21-x-BJD_108A01_AV_01	v∆F, v∆G,v∆J (B8 shows v∆G)	§	this study
FB	vDeltaH	FB1,2D0FB5	SS84345	1069766271, 1133571702	GMR_34C08_BB_21-x-BJD_104E02_AV_01	Most likely v∆H; OL, non-CX, VNC exp; †	§	this study
			SS60493		GMR_74H07_XA_21-x-GMR_91A01_AV_01	may not be v∆H; plus addl v∆ cts; some VNC exp	§	this study
FB	vDeltaJ	FB1D0FB5v	SS82776	695326490, 1415182325	GMR_22G07_BB_37-x-GMR_52F08_AV_01	Could be v∆J, v∆K, v∆L or v∆M; CB# favors v∆J	§	this study
			SS60428		BJD_110E08_BB_21-x-BJD_108A01_AV_01	v∆F, v∆G,v∆J (B1 MCFO shows v∆J)	§	this study
FB	vDeltaK	FB1vD0FB4d5v	SS60427	1444848412, 850462487	BJD_103D04_BB_21-x-GMR_52F08_AV_01	CB# favors v∆K over v∆L; FBl4 arbor fits v∆K >v∆L,v∆M	§	this study
			SS60750		GMR_52F08_BB_03-x-GMR_85G10_AV_01	†	§	this study
			SS82776		GMR_22G07_BB_37-x-GMR_52F08_AV_01	Could be v∆J, v∆K, v∆L or v∆M; CB# favors v∆J; †	§	this study
FB	vDeltaL	FB1vD0FB4	SS84374	1381872829, 1443492867	BJD_122E12_BB_21-x-GMR_52F08_AV_01	†	§	this study
			SS84327		BJD_103D04_BB_21-x-BJD_112D02_AV_01	Could be v∆M but CB# favors v∆L; †	§	this study
			SS82776		GMR_22G07_BB_37-x-GMR_52F08_AV_01	Could be v∆J, v∆K, v∆L or v∆M; CB# favors v∆J; †	§	this study
FB	vDeltaM	FB1vD0FB4	SS00281	1414189518, 602502825	GMR_85G10_XA_21-x-GMR_52F08_XD_01	Ventral spurs match v∆M	§	this study
			SS82776		GMR_22G07_BB_37-x-GMR_52F08_AV_01	Could be v∆J, v∆K, v∆L or v∆M; CB# favors v∆J; †	§	this study
FB	FR1	FB2-5RUB	SS60081	601470598, 788400963	BJD_122B03_BB_21-x-GMR_64A11_AV_01		§	this study
			SS60133		BJD_118E02_BB_21-x-GMR_66B12_AV_01	Some VNC exp.	§	this study
FB	FC1	FB2CRE	SS59801		BJD_103D04_BB_21-x-BJD_129H10_AV_01	At least 2 FC1 cts	§	this study
			SS60159		GMR_41G11_BB_21-x-GMR_64A11_AV_01	Several FC1 cts	§	this study
			SS64320		BJD_122A10_BB_21-x-GMR_66B12_AV_01	At least 2 FC1 cts	§	this study
			SS64331		BJD_103D04_BB_21-x-BJD_125E11_AV_01	At least 2 FC1 cts	§	this study
			SS59799		BJD_103D04_BB_21-x-BJD_121A09_AV_01		§	this study
			SS64334		BJD_103D04_BB_21-x-GMR_66B12_AV_01		§	this study
			SS60353		GMR_91A01_BB_04-x-GMR_64A11_AV_01		§	this study
			SS60370		GMR_41G11_BB_21-x-BJD_122A10_AV_01		§	this study
			SS60157		GMR_30G06_XA_21-x-GMR_64A11_AV_01		§	this study
FB	FC1F	FB2CRE	SS64404	1067110866, 1072503141	GMR_26A08_BB_21-x-GMR_64A11_AV_01	Better fit than FC1C given CB#	§	this study
FB	FC3	FB2,3,5,6CRE	SS62856	1103231711, 1008395737	BJD_122A10_BB_21-x-BJD_126G10_AV_01		§	this study
			SS64375		BJD_112G09_BB_21-x-BJD_126G10_AV_01	†	§	this study
			SS64305		BJD_116H10_BB_21-x-BJD_125D06_AV_01			this study
FB	FS1B	FB2,5,SMPSMP	SS02920	5813041684, 794945885	GMR_65H10_XA_21-x-BJD_118E02_AV_01	Plus FB ct; some VNC exp	§	this study
FB	FS2	FB3,6SMP	SS02920	920441518, 1009038430	GMR_65H10_XA_21-x-BJD_118E02_AV_01	Plus FB ct; some VNC exp	§	this study
FB	FS3	FB1d,3,6,7SMP	SS89746	5813014777, 947681334	BJD_127H05_BB_21-x-GMR_86B06_AV_01	Some non-CX expression; minor stochastic VNC exp	§	this study
FB	FB1A	SMPSIPFB1,3	SS59689	390667603, 421698065	BJD_118B07_BB_21-x-BJD_121B11_AV_01	Similar to FB1F; 2 CB per hemis, so FB1A	§	this study
			SS75852		BJD_106H09_BB_21-x-BJD_121B11_AV_01	Some VNC exp	§	this study
			SS60125		BJD_116C06_BB_21-x-BJD_121B11_AV_01			this study
FB	FB1B	SMPSLPFB1d	SS59695	358251878, 296514350	BJD_121C12_BB_21-x-BJD_115F04_AV_01	FB not perfect match; †	§	this study
			SS69833		GMR_16E08_BB_21-x-BJD_102H07_AV_01	Minor VNC exp; †	§	this study
			SS59684		BJD_115B11_BB_21-x-BJD_128G10_AV_01	Plus FB1F	§	this study
FB	FB1C	LALNOmFB1	SS63879	579268807, 5813055913	BJD_105B05_BB_21-x-BJD_100H10_AV_01		§	this study
			SS63934		BJD_115F08_BB_21-x-GMR_14C03_AV_01		§	this study
FB	FB1D	SLPFB1d	SS59709	265120597, 294791509	GMR_12D12_BB_04-x-GMR_15E01_AV_01	FB alignment not perfect;+FB1E_b? and weak FB dorsal tangential	§	this study
			SS04782		GMR_65H10_XA_21-x-GMR_15E01_AV_01	Plus CX & non-CX ct; VNC exp	§	this study
FB	FB1E_a	SIPSMPFB1d	SS66112	1224254199, 1293468282	BJD_114A10_BB_21-x-GMR_78G09_AV_01	Plus ct; †	§	this study
FB	FB1E_b	SLPSIPFB1d	SS62558	295136965, 5813056768	BJD_126C06_BB_21-x-GMR_65H10_AV_01	Best fit; plus ct	§	this study
FB	FB1F	SMPSIPFB1d	SS59642	5813010148, 1254947903	BJD_108G04_BB_21-x-BJD_128G10_AV_01	Plus non-CX ct; some VNC exp	§	this study
			SS59684		BJD_115B11_BB_21-x-BJD_128G10_AV_01	Plus FB1B	§	this study
FB	FB1G	SMPSIPFB1d,3	SS66114	483245369, 513784136	BJD_102A06_BB_21-x-GMR_24D02_AV_01	Plus 1 ct; some VNC exp; †	§	this study
			SS65999		GMR_24D02_BB_57-x-BJD_102F09_AV_01	Plus 1 ct; some VNC exp; †	§	this study
FB	FB1H	CRENO2,3FB1-4	SS89812	519046655, 5813062858	BJD_113E10_BB_21-x-GMR_48A09_AV_01	Plus non-CX cts; some VNC exp; †	§	this study
			SS89807		BJD_113E10_BB_21-x-BJD_127H05_AV_01	Some non-CX; minor VNC	§	this study
FB	FB1J	SLPSIPFB1,7,8	SS63888	885598938, 885939922	BJD_105H12_BB_37-x-BJD_125F05_AV_01	Plus one CX cell; minor VNC exp; †	§	this study
			SS63564		BJD_105H12_BB_37-x-BJD_125F05_AV_01	Plus one CX cell
			SS68682		BJD_110B04_BB_21-x-GMR_46H07_AV_01	_I5: FB1J; _I6: SAF, so likely both cts	§	this study
FB	FB2A	NOaLALFB2	SS65380	1224941044, 1224595273	GMR_24H12_BB_21-x-GMR_28F06_AV_01		§	this study
			SS70261		BJD_100D09_BB_21-x-BJD_101E11_AV_01	Some VNC exp	§	this study
			SS70302		BJD_103C05_BB_21-x-BJD_101E11_AV_01			this study
FB	FB2B_a	LALCREFB2_1	SS49376	677182018, 5813060787	BJD_119G10_BB_21-x-BJD_124F06_AV_01		§	this study
			SS19425		BJD_120G12_BB_21-x-BJD_114D07_AV_01	May be FB2B_a only (no _b); 2-4 CB/hemis	§
			SS62175		BJD_100G01_BB_21-x-BJD_107H12_AV_01	FB2B_a &_b plus ct; occ minor VNC exp	§	this study
			SS62182		GMR_28D04_BB_21-x-BJD_107H12_AV_01		§	this study
FB	FB2B_b	LALCREFB2_1	SS57264	1224595673, 677182018	BJD_114C05_BB_21-x-BJD_126D10_AV_01	Occ weak exp in FB2B_a; predom _b	§	this study
			SS62175		BJD_100G01_BB_21-x-BJD_107H12_AV_01	FB2B_a &_b plus ct; occ minor VNC exp	§	this study
FB	FB2C	SMPCREFB2_1	SS69732	642715622, 858604252	BJD_107B07_BB_21-x-GMR_27A05_AV_01	Plus non-CX cts; some VNC exp; †	§	this study
			SS66080		BJD_105H12_BB_37-x-GMR_27A05_AV_01	Plus non-CX cts; minor VNC exp; †	§	this study
			SS66082		BJD_115B11_BB_21-x-GMR_27A05_AV_01	Plus FB2L; †	§	this study
			SS62473		BJD_105D12_BB_21-x-BJD_107B07_AV_01			this study
FB	FB2D	LALCREFB2_2	SS69806	734801540, 1194246820	BJD_122H05_BB_21-x-BJD_119C04_AV_01	Minor VNC exp	§	this study
			SS69695		BJD_104E02_BB_21-x-BJD_119C04_AV_01	Some VNC exp; †	§	this study
FB	FB2E	SCLSMPFB2	SS95726	1168625046, 760686202	BJD_126G05_BB_21-x-GMR_45F12_AV_01	2/7 brains exp in FB2I_a; minor VNC exp	§	this study
			SS61624		BJD_115B07_BB_21-x-GMR_12D12_AV_01	Minor non-CX exp; †	§	this study
FB	FB2F_a	SIPSMPFB2	SS02916	670651346, 1224595608	GMR_58G11_XA_21-x-BJD_115E11_AV_01	Poss. FB2F_b; plus non-CX cts	§	this study
			SS61703		BJD_121C02_BB_21-x-BJD_101G02_AV_01	FB2F_a and FB2H best fits. FB2H_a/b v similar; some VNC	§	this study
			SS94582		GMR_77D04_BB_21-x-GMR_50F12_AV_01	Plus FB2F_b,_c; non-CX ct, some VNC exp; †	§	this study
			SS93973		BJD_107D04_BB_21-x-GMR_12D12_AV_01		§	this study
FB	FB2F_b	FB2F_b	SS94612	546852112, 1224258904	BJD_100F04_BB_21-x-GMR_65H10_AV_01	Poss. FB2F_a; non-CX ct; some VNC exp	§	this study
			SS94610		BJD_107D04_BB_21-x-GMR_65H10_AV_01	Poss. +/- FB2F_a; non-CX ct; some VNC exp	§	this study
			SS94582		GMR_77D04_BB_21-x-GMR_50F12_AV_01	Plus FB2F_a,_c; non-CX ct, some VNC exp; †	§	this study
FB	FB2F_c	SIPSMPFB2	SS94582	949986251, 700999023	GMR_77D04_BB_21-x-GMR_50F12_AV_01	Plus FB2F_a,_b; non-CX ct, some VNC exp; †	§	this study
			SS94036		GMR_70B10_BB_04-x-GMR_85D07_AV_01	Plus non-CX ct; †	§	this study
FB	FB2G_a	SMPSIPFB2	SS94458	981362334, 5813078550	BJD_107E11_BB_21-x-BJD_121F03_AV_01	V FB extends more V in LM than EM; some VNC exp; †	§	this study
			SS94447		BJD_117E08_BB_21-x-BJD_124G09_AV_01	OL, VNC exp; †	§	this study
FB	FB2G_b	SIPLALFB2	SS94479	452401246, 1168283924	BJD_124G09_BB_21-x-BJD_114A03_AV_01	Maybe also weak FB2G_b; †	§	this study
			SS94458		BJD_107E11_BB_21-x-BJD_121F03_AV_01	V FB extends more V in LM than EM; some VNC exp; †	§	this study
			SS94447		BJD_117E08_BB_21-x-BJD_124G09_AV_01	OL, VNC exp; †	§	this study
FB	FB2H_a	SIPSCLFB2	SS94597	452401246, 1168283924	GMR_12D12_BB_04-x-GMR_28H10_AV_01	FB2H_a&b; addl CB, so +ct; minor VNC; †	§	this study
			SS61884		BJD_126C05_BB_21-x-BJD_101G02_AV_01	FB2Ha&b; maybe also FB2F; minor VNC; †	§	this study
			SS60877		BJD_126G05_BB_21-x-BJD_101G02_AV_01			this study
			SS93973		BJD_107D04_BB_21-x-GMR_12D12_AV_01			this study
FB	FB2H_b	SIPSCLFB2	SS94597	732034061, 5813061116	GMR_12D12_BB_04-x-GMR_28H10_AV_01	FB2H_a&b; addl CB, so +ct; minor VNC; †	§	this study
			SS61884		BJD_126C05_BB_21-x-BJD_101G02_AV_01	FB2Ha&b; maybe also FB2F; minor VNC; †	§	this study
			SS60877		BJD_126G05_BB_21-x-BJD_101G02_AV_01			this study
FB	FB2I_a	SMPATLFB2	SS94845	1224595644, 575845494	BJD_121G01_BB_21-x-GMR_12D12_AV_01	†	§	this study
			SS94830		BJD_121G01_BB_21-x-GMR_73F07_AV_01	†	§	this study
			SS94571		GMR_19H11_BB_21-x-GMR_12D12_AV_01	Also FB2I_b; minor VNC; †	§	this study
			SS75929		GMR_13B10_BB_21-x-BJD_121G01_AV_01			this study
			SS56319		GMR_33E06_BB_04-x-BJD_100A07_AV_01			this study
			SS56322		GMR_33E06_BB_11-x-BJD_117G02_AV_01			this study
FB	FB2I_b	SMPATLFB2	SS75918	789308735, 729479296	GMR_18A05_BB_21-x-BJD_117G02_AV_01	Plus non-CX ct and possibly FB2I_a; †	§	this study
			SS94571		GMR_19H11_BB_21-x-GMR_12D12_AV_01	Also FB2I_a; minor VNC; †	§	this study
			SS56319		GMR_33E06_BB_04-x-BJD_100A07_AV_01			this study
			SS56322		GMR_33E06_BB_11-x-BJD_117G02_AV_01			this study
FB	FB2J	SMPPLPFB2	SS60954	730337785, 1255979929	BJD_121C12_BB_21-x-BJD_126G05_AV_01		§	this study
			SS50368		GMR_38E08_BB_21-x-BJD_126G05_AV_01	†	§	this study
			SS93973		BJD_107D04_BB_21-x-GMR_12D12_AV_01			this study
			SS60877		BJD_126G05_BB_21-x-BJD_101G02_AV_01			this study
FB	FB2K	LALSMPFB2	SS59604	1287360108, 5813058333	BJD_101E05_BB_21-x-BJD_115B11_AV_01	plus non-CX cts	§	this study
			SS75675		BJD_102F03_BB_21-x-BJD_115B11_AV_01	FB2K+FB3C best fit; run MCFO; poss. more CX ct; minor VNC exp; †	§	this study
FB	FB2L	SMPCREFB2_2	SS75672	5813011125, 516322115	BJD_101B09_BB_21-x-BJD_106H09_AV_01	plus non-CX ct; †	§	this study
			SS65906		BJD_115A07_BB_21-x-BJD_101D08_AV_01	plus CX ct, VNC exp	§	this study
			SS66082		BJD_115B11_BB_21-x-GMR_27A05_AV_01	Plus FB2C; †	§	this study
FB	FB2M	SIPCREFB2	SS94007	1255630284, 1255630350	BJD_126C08_BB_21-x-BJD_104E01_AV_01	Plus non-CX ct; some VNC exp	§	this study
FB	FB3A	LALNO2FB3	SS94879	1131831822, 1162529693	GMR_51E06_XA_21-x-GMR_61E01_XD_01		§	this study
			SS94817		BJD_124B10_BB_21-x-BJD_144D04_AV_01	†	§	this study
			SS61532		BJD_115C01_BB_21-x-GMR_93F07_AV_01			this study
FB	FB3B	EBCREFB3	SS75661	1324209745, 5813057963	BJD_102F03_BB_21-x-BJD_108G05_AV_01	B1 some EB exp; plus FB3C & non-CX ct; some VNC exp	§	this study
			SS75652		BJD_102F03_BB_21-x-BJD_108D03_AV_01	Likely FB3B &3C	§	this study
FB	FB3C	LALSMPFB3	SS65383	1224590555, 1225273264, 1075499064	GMR_26C06_BB_04-x-GMR_34A10_XD_01		§	this study
			SS75735		BJD_113B04_BB_21-x-GMR_24H02_AV_01	Some VNC exp	§	this study
			SS75661		BJD_102F03_BB_21-x-BJD_108G05_AV_01	B1 some EB exp; plus non-CX ct; some VNC exp	§	this study
			SS75941		GMR_24H02_BB_04-x-GMR_55A03_AV_01	Plus FB3E	§	this study
			SS75675		BJD_102F03_BB_21-x-BJD_115B11_AV_01	FB2K+FB3C best fit; run MCFO; poss. more CX ct; minor VNC exp; †	§	this study
			SS75731		BJD_108G05_BB_21-x-GMR_24H02_AV_01			this study
FB	FB3D	LALCREFB3	SS62977	1417573898, 1318028213	BJD_114C06_BB_21-x-BJD_122H05_AV_01		§	this study
			SS69881		GMR_38H12_XA_21-x-GMR_18C11_AV_01	Minor non-CX exp; some VNC	§	this study
FB	FB3E	SMPLALFB3	SS75732	1224591253, 116321068	BJD_102F03_BB_21-x-GMR_24H02_AV_01	Best fit, could just be FB3C; plus ct; minor VNC exp; †	§	this study
			SS75941		GMR_24H02_BB_04-x-GMR_55A03_AV_01	Plus FB3C	§	this study
FB	FB4A	CRESMPFB4_1	SS66578	858933153, 5813087837	BJD_111C12_BB_21-x-BJD_125F10_AV_01		§	this study
			SS87100		BJD_115B07_BB_21-x-BJD_125F10_AV_01	Plus non-CX ct; †	§	this study
			SS72322		BJD_115B07_BB_21-x-GMR_18G01_AV_01	Likely FB5J + 4A since >1CB/hemis; †	§	this study
FB	FB4B	NO2LALFB4	SS60112	1101133698, 1106857669	BJD_114C06_BB_21-x-BJD_129H06_AV_01		§	this study
			SS62952		BJD_109E08_BB_21-x-BJD_114C06_AV_01	†	§	this study
FB	FB4C	CRENO2FB4_1	SS94615	1225290633, 1131836229	BJD_109G08_BB_21-x-GMR_65H10_AV_01	Minor VNC exp	§	this study
			SS94623		BJD_129A12_BB_21-x-GMR_76E08_AV_01	Minor VNC exp; †	§	this study
FB	FB4D	CRESMPFB4_2	SS75680	1100801188, 859618655	BJD_111H11_BB_21-x-BJD_122H07_AV_01	Plus 1 CX ct; †	§	this study
			SS66526		GMR_32F06_BB_21-x-BJD_111E12_AV_01	Plus 1 CX ct, see MCFO; plus 1 occ non-CX ct	§	this study
			SS02752		BJD_113B04_BB_21-x-BJD_122H07_AV_01	4J in MCFO, rare; some VNC exp	§	this study
FB	FB4E	CRELALFB4_1	SS62506	1019607245, 1051280385	BJD_113D09_BB_21-x-GMR_93F07_AV_01	EM morphologies vary	§	this study
			SS66550		BJD_113D09_BB_21-x-BJD_108H11_AV_01		§	this study
FB	FB4G	CRELALFB4_3	SS101002	988567837, 5813061541	BJD_109A01_BB_21-x-BJD_115C01_AV_01	One non-CX ct; minor VNC exp	§	this study
			SS92647		BJD_115B11_BB_21-x-BJD_115C01_AV_01	Weak LCNOpm; †	§	this study
			SS61532		BJD_115C01_BB_21-x-GMR_93F07_AV_01			this study
FB	FB4H	CRELALFB4_4	SS65885	953414780, 5813053846	BJD_113D09_BB_21-x-GMR_11G08_AV_01	2 CB; second may be FB4G?	§	this study
			SS60118		BJD_115B11_BB_21-x-BJD_114D07_AV_01	Plus CX ct	§	this study
FB	FB4J	CRELALFB4_5	SS02752	1109599486, 5813020577	BJD_113B04_BB_21-x-BJD_122H07_AV_01	plus FB4D; 4J in MCFO, rare; some VNC exp	§	this study
			SS66662		BJD_109A01_BB_21-x-GMR_81G11_AV_01	Non-CX cts; VNC exp; †	§	this study
FB	FB4K	CRESMPFB4_3	SS66508	1131831702, 923809011	BJD_121G07_BB_21-x-BJD_105A05_AV_01		§	this study
			SS66517		GMR_56F01_BB_04-x-BJD_108F09_AV_01	plus 1 non-CX ct; some VNC exp; †	§	this study
FB	FB4L	LALSIPFB4	SS61970	1225640135, 5813041180	GMR_75B10_BB_21-x-BJD_128A07_AV_01		§	this study
			SS61590		BJD_111B09_BB_21-x-BJD_127D05_AV_01	†	§	this study
			SS61133		BJD_103B04_BB_21-x-BJD_127D05_AV_01			this study
			SS61593		BJD_111G08_BB_21-x-BJD_127D05_AV_01			this study
FB	FB4M	CRENO2FB4_2	SS67580	1131827390, 1289359184	BJD_128A07_BB_21-x-BJD_107E12_AV_01	Some VNC exp	§	this study
			SS67635		GMR_33E06_BB_04-x-BJD_100H10_AV_01	Plus non-CX ct; some VNC in IS; SS67636 also occasional CX ct, parents GMR_33E06_BB_04-x-BJD_114E01_AV_01, not on robot	§	this study
FB	FB4N	SMPCREFB4	SS95185	5813058422, 673746277	BJD_105G09_BB_21-x-BJD_125F01_AV_01	Minor OL, VNC exp; †	§	this study
			SS66004		BJD_136F04_BB_21-x-BJD_125F01_AV_01	Some VNC exp; †	§	this study
FB	FB4O	CRESMPFB4d	SS61649	768224139, 1016192580	BJD_115F12_BB_21-x-BJD_128H12_AV_01	Poss. FB4R in background; †	§	this study
			SS75876		BJD_118D08_BB_21-x-GMR_80H02_AV_01	†	§	this study
			SS66540		BJD_111A07_BB_21-x-BJD_122A04_AV_01	IS is FB4Q_a; SS is FB4O &FB4R so likely all 3; †	§	this study
			SS69197		GMR_30E08_XA_21-x-BJD_121F09_AV_01	FB4O, 4P, 4Q_a, 4Q_b; †	§	this study
			SS91010		BJD_102D11_BB_21-x-GMR_80H02_AV_01		§§§§§	this study
FB	FB4P_a	CRESMPFB4_ 4	SS60320	1101474458, 893741163	BJD_107H06_BB_21-x-BJD_118D08_AV_01	FB4P_a best fit; IS may be FB4O; possibly both cell types; †	§	this study
			SS66620		BJD_111A07_BB_21-x-BJD_144C11_AV_01	FB4P_a best fit (not_b); one brain in B stock is wrong pattern	§	this study
			SS69197		GMR_30E08_XA_21-x-BJD_121F09_AV_01	FB4O, 4P(_a, _b or both), 4Q_a, 4Q_b; †	§	this study
FB	FB4P_b	CRESMPFB4_ 4	SS67631	5813075748, 862036858	GMR_93D10_BB_04-x-BJD_118D08_AV_01	Minor VNC exp; †	§	this study
			SS60296		BJD_101C12_BB_21-x-BJD_118D08_AV_01	FB4P_b best fit, unlikely FB4P _a; †	§	this study
			SS69197		GMR_30E08_XA_21-x-BJD_121F09_AV_01	FB4O, 4P(_a, _b or both), 4Q_a, 4Q_b; †	§	this study
			SS60306		BJD_102B12_BB_02-x-BJD_113C07_AV_01			this study
FB	FB4Q_a	CRESMPFB4_5	SS02828	859714144, 859977121	BJD_116C06_BB_21-x-GMR_80H02_AV_01	Plus FB4O, FB4P	§	this study
			SS66540		BJD_111A07_BB_21-x-BJD_122A04_AV_01	IS is FB4Q_a; SS is FB4O &FB4R so likely all 3; †	§	this study
			SS69197		GMR_30E08_XA_21-x-BJD_121F09_AV_01	FB4O, 4P, 4Q_a, 4Q_b; †	§	this study
FB	FB4Q_b	CRESMPFB4_5	SS48762	1132168616, 1168603800	GMR_36B06_XA_21-x-BJD_144C11_AV_01	Plus FB4R; †	§	this study
			SS69197		GMR_30E08_XA_21-x-BJD_121F09_AV_01	FB4O, 4P, 4Q_a, 4Q_b; †	§	this study
FB	FB4R	CREFB4	SS89767	1131840673, 1131836336	BJD_115F12_BB_21-x-BJD_122A04_AV_01	Some VNC exp; †	§	this study
			SS61450		BJD_102D11_BB_21-x-BJD_113E05_AV_01	VNC exp	§	this study
			SS66540		BJD_111A07_BB_21-x-BJD_122A04_AV_01	IS is FB4Q_a; SS is FB4O &FB4R so likely all 3; †	§	this study
			SS48762		GMR_36B06_XA_21-x-BJD_144C11_AV_01	Plus FB4Q_b; †	§	this study
			SS61448		BJD_102D11_BB_21-x-BJD_107E06_AV_01			this study
			SS62766		BJD_111A06_BB_21-x-GMR_80H02_AV_01			this study
			SS91010		BJD_102D11_BB_21-x-GMR_80H02_AV_01			this study
FB	FB4X	CRESIPFB4,5	SS70711	548907426, 5813041796	BJD_105B08_BB_21-x-BJD_120E09_AV_01	Likely FB4X; plus CX ct; VNC exp	§	this study
FB	FB4Y	EBCREFB4,5	SS93987	1008378448, 5813027016	BJD_112A02_BB_21-x-GMR_17H12_AV_01	Weak exp; †	§	this study
			SS70895		GMR_44G08_BB_21-x-BJD_105A10_AV_01	Non-CX ct; VNC exp	§	this study
FB	FB4Z	FB4d5v	SS63390	1321430335, 947988379	BJD_111E09_BB_21-x-GMR_30G03_AV_01	Some VNC exp; †	§	this study
			SS95748		BJD_103D10_BB_21-x-GMR_51G05_AV_01	Minor OL and CB exp; some VNC exp	§	this study
			SS69089		BJD_111E09_BB_21-x-GMR_54G07_AV_01	Plus FB5U best fits; some VNC exp	§	this study
FB	FB5A	LALCREFB5	SS69102	707539688, 614081151	BJD_115C05_BB_21-x-GMR_35C10_AV_01	Minor VNC; †	§	this study
			SS69074		BJD_108H09_BB_21-x-GMR_35C10_AV_01	Minor OL exp; some VNC exp; †	§	this study
FB	FB5AA	SMPCREFB5_10	SS71548	5813060701, 1039400328	GMR_89H10_BB_21-x-BJD_102B05_AV_01	Not certain FB5AA; plus CX cts; OL exp; †	§	this study
FB	FB5AB	SIPCREFB5d	SS32244	5813047763, 946304488	GMR_13F04_BB_21-x-GMR_20H08_AV_01		§	this study
			SS87368		BJD_125B01_BB_21-x-GMR_21C08_XD_01		§	this study
FB	FB5B	SMPSIPFB5d_1	SS67490	487523851, 548571023	BJD_104C06_BB_21-x-BJD_111G10_AV_01		§	this study
			SS92530		BJD_123C10_BB_21-x-GMR_33C10_AV_01	Non-CX ct; minor VNC exp; †	§	this study
			SS67498		BJD_111G10_BB_21-x-BJD_124B08_AV_01	FB5B,6R,6Y; likely all expressed; diff. cell types in diff brains	§	this study
			SS95274		BJD_124B08_BB_37-x-GMR_26E12_AV_01	Plus FB6Q; some VNC exp	§	this study
FB	FB5C	SMPCREFB5_1	SS71449	5812983636, 486842208	BJD_117F06_BB_21-x-BJD_120F12_AV_01	Plus FB5H, poss. add'l ct?; †	§	this study
			SS69105		BJD_115C12_BB_21-x-BJD_128A04_AV_01	†	§	this study
FB	FB5D	CRESMPFB5_1	SS71471	890671753, 5813076043	BJD_126G06_BB_21-x-GMR_55D08_AV_01	Plus CX, non-CX, VNC exp; †	§	this study
			SS66648		GMR_30D04_BB_21-x-BJD_126G06_AV_01	Plus 5X, CX, OL, VNC exp; †	§	this study
			SS71764		BJD_115G01_BB_21-x-GMR_52A01_AV_01	Plus 5T, non-CX, VNC exp	§	this study
FB	FB5F	SMPCREFB5_2	SS71774	736286550, 705463539	BJD_120F12_BB_21-x-GMR_72B05_AV_01	Plus FB5Q (5F in MCFO); †	§	this study
			SS71803		BJD_125H05_BB_21-x-BJD_117G05_AV_01	Plus CX ct (5X, 5Q)	§	this study
			SS71790		BJD_123C02_BB_21-x-BJD_117G05_AV_01	Plus FB5Q , non-CX ct, VNC exp	§	this study
FB	FB5G	SMPSIPFB5,6	SS71748	578936675, 329983926	BJD_115B12_BB_21-x-GMR_20F03_AV_01	Likely FB5G; maybe another FB5 ct; VNC exp	§	this study
			SS61697		BJD_120F12_BB_21-x-BJD_123C02_AV_01	Likely FB5G; plus another FB5 ct; non-CX ct; †	§	this study
FB	FB5H	CRESMPFB5_3	SS100552	362715189, 486315287	BJD_100A05_BB_21-x-BJD_122A08_AV_01	Plus non-CX, OL, VNC exp; †	§	this study
			SS71449		BJD_117F06_BB_21-x-BJD_120F12_AV_01	Plus FB5C, poss. add'l ct?; †	§	this study
			SS72834		BJD_116H11_BB_21-x-BJD_120E09_AV_01	Minor VNC exp	§	this study
FB	FB5I	SMPCREFB5_3	SS100553	5813047616, 423770604	BJD_100A05_BB_21-x-BJD_137B07_AV_01	Some VNC exp; †	§	this study
FB	FB5J	SMPFB5	SS72322	1102514975, 766863785	BJD_115B07_BB_21-x-GMR_18G01_AV_01	Likely FB5J + 4A since >1CB/hemis; †	§	this study
FB	FB5K	CREFB5	SS75848	5812980666, 952166828	BJD_105H12_BB_37-x-GMR_11C05_AV_01	Also FB6O; FB5L in IS; minor VNC exp; †	§	this study
			SS70334		BJD_109A01_BB_21-x-BJD_110B04_AV_01	Minor VNC exp	§	this study
			SS70354		BJD_110B04_BB_21-x-GMR_51G07_AV_01	Minor non-CX exp	§	this study
			SS62184		GMR_11C05_XA_21-x-BJD_114D07_AV_01			this study
FB	FB5L	CRESMPFB5_4	SS75878	5813022949, 977339122	BJD_107B07_BB_21-x-GMR_11C05_AV_01		§	this study
			SS70875		GMR_32H08_BB_21-x-GMR_51G07_AV_01	†	§	this study
			SS62184		GMR_11C05_XA_21-x-BJD_114D07_AV_01		§	this study
			SS61528		BJD_107B07_BB_21-x-BJD_124G02_AV_01			this study
FB	FB5M	CRESMPFB5_5	SS95675	1132846376, 1070426862	GMR_61H09_BC_21-x-BJD_103G10_AV_01	†	§	this study
			SS69713		BJD_105H12_BB_37-x-BJD_115B07_AV_01	FB5M, 5N & 5W	§	this study
FB	FB5N	SMPCREFB5_4	SS70949	1008024276, 5813058442	GMR_61H09_BC_21-x-BJD_118B07_AV_01	IS has extra FB ct	§	this study
			SS70945		GMR_61H09_BC_21-x-BJD_105H12_AV_01	Poss. 5W instead; need MCFO; †	§	this study
			SS95675		GMR_61H09_BC_21-x-BJD_103G10_AV_01	†	§	this study
			SS69713		BJD_105H12_BB_37-x-BJD_115B07_AV_01	FB5M, 5N & 5W	§	this study
FB	FB5O	SMPCREFB5_5	SS61471	1039400642, 1039068185	BJD_103G04_BB_21-x-BJD_102D05_AV_01	Weak; plus FB cts; VNC exp; †	§	this study
			SS73005		BJD_120F12_BB_21-x-GMR_32G08_AV_01	Plus FB6X +/- FB6W; some VNC exp	§	this study
FB	FB5P	SMPCREFB5_6	SS71755	1102191395, 1039080957	BJD_115G01_BB_21-x-BJD_101G11_AV_01	FB5P best fit, unlikely FB5O; some VNC; †	§	this study
FB	FB5Q	SMPCREFB5d	SS71742	607933758, 640665331	BJD_115B12_BB_21-x-BJD_117G05_AV_01	†	§	this study
			SS71790		BJD_123C02_BB_21-x-BJD_117G05_AV_01	Plus FB5F (FB5Q in MCFO)	§	this study
			SS71803		BJD_125H05_BB_21-x-BJD_117G05_AV_01	Plus CX ct (5X, 5Q)	§	this study
			SS71774		BJD_120F12_BB_21-x-GMR_72B05_AV_01	Plus FB5F, non-CX ct, VNC exp; †	§	this study
FB	FB5R	FB5	SS63351	1074859771, 1132884644	BJD_106E10_BB_21-x-BJD_111E09_AV_01	FB5R, 5S, 4Z, 6L	§	this study
			SS69215		GMR_54G07_BB_21-x-BJD_100C04_AV_01	All or subset of: FB5R, 5S, 5U, 4Z; †	§	this study
FB	FB5S	FB5d,6v	SS95689	1070810640, 980737209	BJD_111E09_BB_21-x-GMR_31D07_AV_01	Could be FB5U; some VNC exp; †	§	this study
			SS63351		BJD_106E10_BB_21-x-BJD_111E09_AV_01	FB5R, 5S, 4Z, 6L	§	this study
FB	FB5T	CRESMPFB5_6	SS71764	1070102904, 828934059	BJD_115G01_BB_21-x-GMR_52A01_AV_01	Plus 5D, non-CX, VNC exp	§	this study
			SS71758		BJD_115G01_BB_21-x-BJD_119C05_AV_01	Plus non-CX, VNC exp; †	§	this study
			SS61439				§	this study
FB	FB5U	FB5d	SS95689	1012112513, 977995796	BJD_111E09_BB_21-x-GMR_31D07_AV_01	FB5U better fit than FB5S; minor OL, some VNC exp; †	§	this study
			SS69089		BJD_111E09_BB_21-x-GMR_54G07_AV_01	Plus FB4Z best fits; some VNC exp	§	this study
FB	FB5V	CRELALFB5	SS88825	1050935614, 864073833	BJD_124B11_BB_21-x-GMR_78H12_AV_01	Minor non-CX exp; some VNC exp; †	§	this study
			SS88827		GMR_48E02_BB_21-x-GMR_78H12_AV_01	Some non-CX and VNC exp; †	§	this study
FB	FB5W	SMPCREFB5_7	SS95617	957506896, 5813053851	GMR_61H09_BC_21-x-BJD_122H05_AV_01	Morph variability in EM	§	this study
			SS66653		BJD_122H05_BB_21-x-BJD_125F10_AV_01	Plus non-CX ct; minor VNC exp; †	§	this study
			SS69713		BJD_105H12_BB_37-x-BJD_115B07_AV_01	FB5M, 5N & 5W	§	this study
FB	FB5X	SMPCREFB5_8	SS71706	705118017, 768932330	BJD_102B12_BB_21-x-BJD_100B06_AV_01	Possibly also FB5T; some non-CX ct; minor VNC exp	§	this study
			SS66648		GMR_30D04_BB_21-x-BJD_126G06_AV_01	Plus 5D, CX, OL, VNC exp; †	§	this study
FB	FB5Y	SMPSIPFB5d_2	SS71787	1008378609, 977338882	BJD_122B03_BB_21-x-GMR_48A03_AV_01	Some VNC exp	§	this study
			SS70732		BJD_106F04_BB_21-x-BJD_122B03_AV_01	Plus CX cts	§	this study
FB	FB5Z	SMPCREFB5_9	SS71809	977006924, 642365841	BJD_125H05_BB_21-x-GMR_69A01_AV_01	Some non-CX, OL, VNC exp; †	§	this study
			SS71836		GMR_72B05_XA_21-x-GMR_69A01_AV_01	Best fit; weak, some non-CX, OL, VNC exp; †	§	this study
FB	FB6A	SMPSIPFB6_1	SS57656	946308203, 5813061495	GMR_42H01_XA_21-x-GMR_84C10_AV_01	1 CB per hemis.	§; §§§§	this study
			SS95731		BJD_119E04_BB_21-x-GMR_84C10_AV_01	2 CB per hemis.; †	§	this study
			SS54343		GMR_42H01_BB_04-x-GMR_23E10_AV_01_2			this study
			SS56343		GMR_84C10_BB_11-x-BJD_128H03_AV_01			this study
FB	FB6B	SMPSIPFB6_2	SS72415	91561061, 577373434	GMR_48A03_BB_21-x-BJD_114A03_AV_01		§	this study
			SS72722		BJD_122A04_BB_21-x-BJD_114A03_AV_01	Some OL exp	§	this study
FB	FB6C_a	SIPSMPFB6_1	SS71442	946645313, 5813069331	BJD_113E11_BB_21-x-GMR_44H01_AV_01	Plus FB6C_b; some VNC exp; †	§	this study
FB	FB6C_b	SIPSMPFB6_1	SS56046	5813019588, 5813057169	GMR_34E09_BB_04-x-GMR_84C10_AV_01	Plus FB6D	§	this study
			SS71442		BJD_113E11_BB_21-x-GMR_44H01_AV_01	Plus FB6C_a; some VNC exp; †	§	this study
			SS71508		GMR_28F06_XA_21-x-GMR_44H01_AV_01	Plus CX cts;†	§	this study
			SS56343		GMR_84C10_BB_11-x-BJD_128H03_AV_01			this study
FB	FB6D	SMPFB6	SS56046	946641212, 5813026514	GMR_34E09_BB_04-x-GMR_84C10_AV_01	Plus FB6C_b	§	this study
			SS76131		BJD_117B07_BB_21-x-GMR_41C01_AV_01	Plus CX ct	§	this study
			SS56343		GMR_84C10_BB_11-x-BJD_128H03_AV_01			this study
FB	FB6E	SIPSMPFB6_2	SS70753	5813049824, 422876942	BJD_110C06_BB_21-x-BJD_119C05_AV_01	Some VNC exp; †	§	this study
			SS72798		BJD_108H11_BB_21-x-BJD_109E07_AV_01	Plus CX ct; minor VNC exp	§	this study
FB	FB6F	SMPSIPFB6_3	SS59390	513788774, 946978006	BJD_120E09_BB_21-x-GMR_43D09_AV_01	Plus FB7B+ct; †	§	this study
FB	FB6G	SIPSMPFB6_3	SS72411	329289084, 915964590	GMR_46E07_XA_21-x-BJD_129C08_AV_01		§	this study
			SS72730		BJD_128H03_BB_21-x-BJD_129C08_AV_01	Minor VNC exp	§	this study
			SS70710		BJD_105A09_BB_21-x-BJD_128H03_AV_01	Plus 6I, 7A; †	§	this study
FB	FB6H	SMPSIPFB6_4	SS95649	5813020684, 915960391	BJD_116H11_BB_21-x-BJD_103E11_AV_01	Plus weak CX ct	§	this study
			SS95720		BJD_103E11_BB_21-x-GMR_83H12_AV_01	Some VNC exp; †	§	this study
			SS72834		BJD_116H11_BB_21-x-BJD_120E09_AV_01	Minor VNC exp	§	this study
FB	FB6I	SMPSIPFB6_5	SS75992	452029745, 5813058367	GMR_22A12_BB_21-x-GMR_49D04_AV_01	Some VNC exp; †	§	this study
			SS70710		BJD_105A09_BB_21-x-BJD_128H03_AV_01	Plus FB6G, 7A; †	§	this study
FB	FB6J	FB6_1	SS95642	916305728, 5813041705	BJD_103D10_BB_21-x-BJD_125B08_AV_01	Plus non-CX, VNC exp; †	§	this study
			SS101367		GMR_53C03_BB_04-x-BJD_103A07_AV_01	Plus FB, non-CX ct; some VNC exp; †	§	this study
FB	FB6K	SMPSIPFB6_6	SS72302	947685488, 1041446765	BJD_107H05_BB_21-x-BJD_120H09_AV_01	Plus OL, VNC exp; †	§	this study
			SS77073		BJD_107H05_BB_21-x-GMR_22E10_AV_01	Plus FB8C, non-CX, VNC exp; †	§	this study
FB	FB6L	FB6_2	SS95206	946658448, 1012449420	BJD_111E09_BB_21-x-BJD_122H02_AV_01	Minor MB, VNC exp	§	this study
			SS95750		BJD_125B08_BB_21-x-GMR_51G05_AV_01	Plus FB7J, Delta7; OL; non-CX, some VNC exp; †	§	this study
FB	FB6M	WEDLALFB6	SS49931	1220800405, 978673646	BJD_108H07_BB_21-x-BJD_106B05_AV_01	Minor VNC exp	§	this study
			SS72731		GMR_53C03_XA_21-x-BJD_102F06_AV_01	3 CB/hemisphere; should be 2	§	this study
FB	FB6N	CRESMPFB6_1	SS102116	860305498, 889414782	BJD_105H12_BB_37-x-GMR_33B06_AV_01	IS: FB6N, SS: FB6O. SS likely 6O&6N; †	§	this study
			SS63520		BJD_105D03_BB_21-x-BJD_110E11_AV_01	Plus 7H; †	§	this study
			SS72398		GMR_32H08_BB_21-x-GMR_57G11_AV_01	Plus FB7H, non-CX ct; †	§	this study
			SS63527		BJD_105H12_BB_37-x-BJD_110B04_AV_01			this study
FB	FB6O	SIPSMPFB6_4	SS102116	978366493, 947663945	BJD_105H12_BB_37-x-GMR_33B06_AV_01	IS: FB6N, SS: FB6O. SS likely 6O&6N; †	§	this study
			SS75848		BJD_105H12_BB_37-x-GMR_11C05_AV_01	Also FB5K; FB5L in IS; minor VNC exp; †	§	this study
FB	FB6P	SMPCREFB6_1	SS60140	5813088939, 915605943	BJD_122H05_BB_21-x-BJD_122H07_AV_01	Minor VNC exp	§	this study
			SS60161		GMR_50G08_BB_21-x-BJD_122H07_AV_01	Some VNC exp; †	§	this study
FB	FB6Q	SIPSMPFB6_5	SS67486	393215048, 360319323	BJD_116F02_BB_21-x-BJD_124B08_AV_01	See IS for VNC; minor VNC exp; †	§	this study
			SS95274		BJD_124B08_BB_37-x-GMR_26E12_AV_01	Plus 5B; some VNC exp	§	this study
			SS101453		BJD_104C06_BB_21-x-GMR_51F07_AV_01	Plus FB6S? VNC exp; †	§	this study
FB	FB6R	SMPSIPFB6_7	SS67498	576208238, 1011068028	BJD_111G10_BB_21-x-BJD_124B08_AV_01	FB5B,6R,6Y; likely all expressed; diff. cell types in diff brains	§	this study
FB	FB6S	SIPSMPFB6_6	SS101453	330661573, 455456949	BJD_104C06_BB_21-x-GMR_51F07_AV_01	Plus FB6Q; VNC exp; †	§	this study
			SS92377		GMR_13H04_BB_21-x-BJD_121C11_AV_01	Likely also FB7F; †	§	this study
FB	FB6T	SIPSMPFB6_7	SS92390	359637824, 5813050758	BJD_115F09_BB_21-x-BJD_100A07_AV_01	IS strong, SS weak; †	§	this study
			SS92409		BJD_122E03_BB_21-x-BJD_108C09_AV_01	Minor VNC exp; †	§	this study
			SS67611		BJD_116F08_BB_21-x-GMR_75H04_AV_01	6T weak, see in MCFO; plus ER3p_a,b; minor VNC exp; †	§	this study
FB	FB6U	SMPCREFB6_2	SS95180	29894444, 977002744	GMR_55D02_XA_21-x-BJD_123C12_AV_01	Plus non-CX ct; minor VNC exp; †	§	this study
			SS72743		GMR_55D02_XA_21-x-BJD_115C12_AV_01	OL & minor VNC exp	§	this study
FB	FB6V	SMPCREFB6_3	SS101418	915960293, 1008369816	BJD_110E01_BB_21-x-GMR_15D05_AV_01	Plus FB8G; minor VNC exp; †	§	this study
			SS72743		GMR_55D02_XA_21-x-BJD_115C12_AV_01		§	this study
			SS94527		BJD_103A08_BB_21-x-BJD_121C12_AV_01	Plus FB7A, 7G, maybe 7I	§	this study
FB	FB6W	CRESMPFB6_2	SS73005	1071121755, 549385850	BJD_120F12_BB_21-x-GMR_32G08_AV_01	Plus FB5O; +/or FB6X; some VNC exp; †	§	this study
FB	FB6X	SMPCREFB6_4	SS95239	946300310, 422742649	GMR_30E08_BB_04-x-GMR_85F05_AV_01	Plus CX cell type; occasional minor VNC exp	§	this study
			SS73005		BJD_120F12_BB_21-x-GMR_32G08_AV_01	Plus FB5O; +/or FB6W; some VNC exp;†	§	this study
FB	FB6Y	SMPSIPFB6_8	SS67498	454939928, 454089465	BJD_111G10_BB_21-x-BJD_124B08_AV_01	FB5B,6R,6Y; likely all; diff. cell types in diff brains; †	§	this study
FB	FB7A	SIPSLPFB7	SS94578	5813020735, 297183251	BJD_103A08_BB_21-x-GMR_50F12_AV_01	†	§	this study
			SS55876		GMR_12D12_BB_04-x-GMR_23E10_AV_01_2		§	this study
			SS94527		BJD_103A08_BB_21-x-BJD_121C12_AV_01	Plus FB7A, 7G, maybe 7I	§	this study
			SS70710		BJD_105A09_BB_21-x-BJD_128H03_AV_01	Plus FB6G, 6I; †	§	this study
			SS55888		GMR_12D12_XA_21-x-GMR_23E10_AV_01_2			this study
			SS55882		GMR_12D12_BB_04-x-GMR_84C10_AV_01			this study
FB	FB7B	SMPSLPFB7	SS67858	5813020698, 948346463	BJD_114E05_BB_21-x-BJD_108D04_AV_01	Minor VNC exp	§	this study
			SS62563		GMR_12D12_BB_04-x-GMR_15C05_AV_01	Some VNC exp; plus weak cell - 7A?; †	§	this study
			SS55882		GMR_12D12_BB_04-x-GMR_84C10_AV_01			this study
FB	FB7C	SMPSIPFB7_1	SS67505	5813010828, 575319031	GMR_20C11_BB_04-x-GMR_51F07_AV_01	FB7C and/or FB7M +FB6ct+non-CX+OL+VNC exp.	§	this study
FB	FB7D	FB7,6	SS70837	1012112398, 916305683	BJD_126C05_BB_21-x-BJD_120E09_AV_01	Plus CX ct; weak; CB# unknown, could include FB7J; minor VNC exp; †	§	this study
			SS77099		BJD_114G11_BB_21-x-GMR_30G03_AV_01	Plus FB7J; some VNC exp; †	§	this study
FB	FB7E	SMPSIPFB7_2	SS95241	361364000, 329638509	BJD_120B02_BB_21-x-GMR_85F05_AV_01	Minor OL, non-CX ct; VNC exp; †	§	this study
			SS95240		BJD_105D02_BB_21-x-GMR_85F05_AV_01	Weak, plus non-CX cts; some VNC exp; †	§	this study
FB	FB7F	SMPSIPFB7_3	SS92377	298927224, 299078990	GMR_13H04_BB_21-x-BJD_121C11_AV_01	Likely FB7F; also FB6S; †	§	this study
FB	FB7G	SMPFB7,8	SS94527	5813009882, 266536576	BJD_103A08_BB_21-x-BJD_121C12_AV_01	Plus FB7A, 6V & maybe FB7I	§	this study
			SS94781		GMR_67A07_BB_21-x-BJD_114G10_AV_01	Minor non-CX and VNC exp; †	§	this study
FB	FB7H	SMPFB7	SS63520	1009375310, 915619188	BJD_105D03_BB_21-x-BJD_110E11_AV_01	Plus FB6N; †	§	this study
			SS63542		BJD_107B07_BB_21-x-BJD_110E11_AV_01	Not certain FB7H; +ct; minor VNC	§	this study
			SS72398		GMR_32H08_BB_21-x-GMR_57G11_AV_01	Plus 6N, non-CX ct; †	§	this study
			SS63527		BJD_105H12_BB_37-x-BJD_110B04_AV_01			this study
FB	FB7I	SMPSIPFB7,6	SS94465	885262087, 915951662	GMR_47C08_XA_21-x-BJD_109A12_AV_01	Plus CX and non-CX ct; VNC exp	§	this study
			SS94527		BJD_103A08_BB_21-x-BJD_121C12_AV_01	Maybe FB7I - MCFO to confirm; also FB7G,7A,6V	§	this study
FB	FB7J	FB7,8	SS77061	915610725, 885599260	BJD_114G11_BB_21-x-GMR_51E05_AV_01	Some non-CX exp; some VNC exp; †	§	this study
			SS63411		BJD_114G11_BB_21-x-BJD_120H09_AV_01	Must have occ. FB7D since occ. 3 CB per. hemis; some VNC exp; †	§	this study
			SS77099		BJD_114G11_BB_21-x-GMR_30G03_AV_01	Plus FB7D; some VNC exp; †	§	this study
			SS95750		BJD_125B08_BB_21-x-GMR_51G05_AV_01	Plus FB6L, ∆7; OL; non-CX, some VNC exp; †	§	this study
FB	FB7K	SLPSIPFB7	SS63022	5813081818, 294800293	GMR_21A07_BB_21-x-GMR_12D12_AV_01	1 brain wrong, weak ct; minor OL exp; †	§	this study
FB	FB7L	SMPSIPFB7_4	SS61682	884916654, 885262311	BJD_118C01_BB_21-x-BJD_120F01_AV_01	One FB8H cell in 2 MCFOs; †	§	this study
			SS75905		BJD_143G07_BB_21-x-BJD_126D07_AV_01	Some VNC exp	§	this study
			SS71787		BJD_122B03_BB_21-x-GMR_48A03_AV_01	Some VNC exp	§	this study
FB	FB7M	SMPSIPFB7_5	SS67505	295477903, 234292899	GMR_20C11_BB_04-x-GMR_51F07_AV_01	FB7C and/or FB7M +FB6ct+non-CX+OL+VNC exp	§	this study
			SS94607		BJD_110F04_BB_21-x-GMR_26E12_AV_01	Messy; best fits FB8D &FB7M; plus non-CX and VNC exp; †	§	this study
			SS94504		BJD_110F04_BB_21-x-BJD_123H10_AV_01	Best fits: FB7M, FB8D; possibly also FB8F_b; plus non-CX cts	§	this study
FB	FB8A	SLPSMPFB8_1	SS68790	295136778, 980391580	BJD_116H11_BB_21-x-GMR_70H11_XD_01	Non-CX ct; minor VNC exp; †	§	this study
			SS68820		BJD_105D06_BB_21-x-GMR_70H11_XD_01	Some VNC; †	§	this study
FB	FB8B	PLPSLPFB8	SS61503	949045811, 977995787	BJD_105D06_BB_21-x-BJD_120F03_AV_01	Some non-CX and VNC exp	§	this study
			SS61940		GMR_22E10_XA_21-x-BJD_100A01_AV_01	Some non-CX and VNC exp; †	§	this study
			SS61934		GMR_14G10_BB_21-x-BJD_105D06_AV_01	FB8B&C, 8C weak; some non-CX and VNC exp	§	this study
			SS47633		BJD_118A01_BB_21-x-GMR_22E10_AV_01			this study
			SS47631		BJD_118A01_BB_21-x-BJD_103G11_AV_01			this study
FB	FB8C	SMPFB8	SS69117	885257860, 948363764	BJD_118E04_BB_21-x-BJD_122F11_AV_01	Some VNC exp	§	this study
			SS92503		BJD_124E08_BB_21-x-GMR_50F12_AV_01	Some VNC exp; †	§	this study
			SS61934		GMR_14G10_BB_21-x-BJD_105D06_AV_01	FB8B&C, 8C weak; some non-CX and VNC exp	§	this study
			SS47633		BJD_118A01_BB_21-x-GMR_22E10_AV_01			this study
FB	FB8D	SLPSMPFB8_2	SS92555	325489440, 5813058338	BJD_111G10_BB_21-x-GMR_53F05_XD_01	†	§	this study
			SS92547		BJD_112D02_BB_21-x-GMR_51F07_AV_01	Weak; plus non-CX cts and VNC exp; †	§	this study
			SS94607		BJD_110F04_BB_21-x-GMR_26E12_AV_01	Messy; best fits FB8D &FB7M; plus non-CX and VNC exp; †	§	this study
			SS94504		BJD_110F04_BB_21-x-BJD_123H10_AV_01	Best fits: FB7M, FB8D; possibly also FB8F_b; plus non-CX cts	§	this study
FB	FB8E	SMPSIPFB8_1	SS69062	295820085, 296160764	BJD_108D01_BB_21-x-BJD_110G09_AV_01	Some VNC exp; †	§	this study
			SS69068		BJD_108D01_BB_21-x-GMR_61H01_AW_01	Plus FB8G, CX, non-CX; †	§	this study
FB	FB8F_a	SIPSLPFB8	SS75533	328213227, 328930845	GMR_16D01_BB_04-x-BJD_132E10_AV_01	Likely FB8F_a&_b	§	this study
			SS69168		GMR_13H04_BB_21-x-BJD_103H09_AV_01	FB8F_a&b	§	this study
FB	FB8F_b	SIPSLPFB8	SS75531	5813069498, 296155122	GMR_13H04_BB_21-x-GMR_16D01_AV_01	†	§	this study
			SS92533		GMR_13H04_BB_21-x-GMR_55A03_AV_01	†	§	this study
			SS69168		GMR_13H04_BB_21-x-BJD_103H09_AV_01	FB8F_a&b	§	this study
			SS75533		GMR_16D01_BB_04-x-BJD_132E10_AV_01	Likely FB8F_a&_b	§	this study
FB	FB8G	SMPSIPFB8_2	SS102104	421357275, 358259842	BJD_108D01_BB_21-x-BJD_105C04_AV_01	Can't rule out possible weak FB8E; minor VNC exp; †	§	this study
			SS101418		BJD_110E01_BB_21-x-GMR_15D05_AV_01	Plus FB6V; minor VNC exp; †	§	this study
			SS69068		BJD_108D01_BB_21-x-GMR_61H01_AW_01	Plus FB8E, CX, non-CX; †	§	this study
FB	FB8H	SMPSLPFB8	SS63928	885599043, 295820069	BJD_111D07_BB_21-x-GMR_13D05_AV_01	†	§	this study
			SS61947		GMR_23E12_BB_04-x-BJD_120F01_AV_01	IS fits FB8A so poss. FB8A too; †	§	this study
			SS75512		BJD_122B03_BB_21-x-BJD_120F01_AV_01			this study
FB	FB9A	SLPFB9_1	SS92397	5813127091, 295133452	BJD_111G10_BB_21-x-BJD_112D02_AV_01	FB9A best guess; alt is FB9C_a but unlikely to separate 9C_a from _b. Some VNC exp; †	§	this study
			SS68016		BJD_118H09_BB_21-x-GMR_11F12_AV_01	Plus 9B or 9C; plus non_CX ct; some VNC exp; †	§	this study
			SS59629		BJD_106H09_BB_21-x-GMR_65H10_AV_01	Uncertain if FB9A; +FB9C_a&_b; †	§	this study
FB	FB9B	SLPFB9_2	SS68061		BJD_120F12_BB_21-x-GMR_17C09_AV_01	Subset of FB9B. Minor VNC exp; †	§	this study
			SS68075		GMR_20G10_BB_21-x-GMR_51G03_AV_01	Subset of FB9B. No to minimal VNC exp; †	§	this study
			SS48756		GMR_20G10_BB_21-x-BJD_115F10_AV_01	Mult subtypes; minor VNC exp; †	§	this study
			SS68005		BJD_119H07_BB_21-x-BJD_120F12_AV_01	Subset of FB9B; minor VNC exp	§	this study
			SS68061		BJD_120F12_BB_21-x-GMR_17C09_AV_01	Subset of FB9B; minor VNC exp	§	this study
			SS68049		BJD_123C11_BB_21-x-GMR_17C09_AV_01	Subset of FB9B; some VNC exp; †	§	this study
			SS68028		BJD_115F10_BB_21-x-GMR_20G10_AV_01	Subset of FB9B; some VNC exp; †	§	this study
			SS68063		BJD_120F12_BB_21-x-GMR_51G03_AV_01	Subset of FB9B; some VNC exp	§	this study
FB	FB9C_a	SLPFB9_2	SS59629	855250466, 451356082	BJD_106H09_BB_21-x-GMR_65H10_AV_01	FB9C_a,b; poss. also 9A; †	§	this study
	FB9C_b	SLPFB9_2	SS59629	295141618, 482050067	BJD_106H09_BB_21-x-GMR_65H10_AV_01	FB9C_a,b; poss. also 9A; †	§	this study
EB	EL	EBGAs	SS00091	696682163, 1036753721	GMR_19G02_XA_21-x-GMR_18B05_XD_01		§	this study
			SS00026		GMR_38C04_XA_21-x-GMR_17H12_XD_01		§	this study
			SS53322		GMR_19G02_XA_21-x-GMR_93G02_AV_01		§	this study
			SS00027		GMR_38C04_XA_21-x-GMR_18B05_XD_01			this study
			SS60093		BJD_128D10_BB_21-x-BJD_103C03_AV_01			this study
EB	ExR1		SS59436	948709216, 949710555	GMR_42G10_XA_21_BX3G_1500005-x-GMR_22H10_AV_01	†	§	this study
			SS04830		BJD_116E06_BB_21-x-BJD_113C07_AV_01	Some VNC exp	§	this study
			SS09135		GMR_24B11_XA_21-x-GMR_13E12_AV_01			this study
			SS56803		GMR_24B11_XA_21-x-GMR_42G10_AV_01			this study
			SS56684		GMR_24B11_XA_21-x-GMR_78A01_AV_01			this study
EB	ExR2		SS59679	1198330286, 1449247522	BJD_115B06_BB_21-x-GMR_72E10_AV_01	Occ exp in non-CX cells; minimal VNC exp	§	this study
			SS58826		BJD_126E08_BB_21-x-BJD_126F12_AV_01		§	this study
EB	ExR3		SS82798	1036637638, 919763043	BJD_125F01_BB_21-x-GMR_78B06_AV_01	Minimal VNC exp; †	§	this study
			SS82773		GMR_78B06_XA_21-x-GMR_24C07_AV_01	†	§	this study
			SS61641		BJD_115D05_BB_21-x-BJD_109D11_AV_01			this study
			SS04919		BJD_125F01_BB_21-x-BJD_112F08_AV_01			this study
EB	ExR4		SS58784	1730608428, 1198330641	BJD_109E01_BB_21-x-BJD_144B04_AV_01		§	this study
			SS58788		BJD_111E12_BB_21-x-BJD_115A02_AV_01	NO & non-CX exp; some VNC exp	§	this study
EB	ExR5		SS51128	1043825714, 5813060726	BJD_117H07_BB_21-x-GMR_86F02_AV_01	Minor VNC exp	§	this study
			SS82294		BJD_117B08_BB_21-x-GMR_86F02_AV_01	Minor VNC exp; †	§	this study
			SS65188		BJD_140C02_BB_21-x-BJD_144E06_AV_01			this study
			SS65155		BJD_117H07_BB_21-x-BJD_144E06_AV_01			this study
EB	ExR6		SS53617	858587718, 1228692168	BJD_103H01_BB_21-x-BJD_116C06_AV_01	One brain has additional expression	§	this study
			SS58754		BJD_103A09_BB_21-x-BJD_115A02_AV_01	Some non-CX and VNC exp	§	this study
EB	ExR7		SS65157	1259386264, 1105882358	BJD_119F10_BB_21-x-BJD_123A04_AV_01	Some VNC exp	§	this study
			SS82313		BJD_123C07_BB_21-x-BJD_119F10_AV_01	†	§	this study
EB	ExR8		SS65849	1259718093, 1601715638	GMR_80E02_BB_37-x-BJD_123D02_AV_01	Minor VNC exp	§	this study
			SS49695		BJD_112G08_BB_21-x-BJD_100A02_AV_01	Minor non-CX and VNC exp	§	this study
EB	ER1_a		SS65915	1294414279, 1322470462	GMR_12C04_BB_21-x-BJD_114C05_AV_01	Minor non-CX exp; †	§	this study
			SS00057		GMR_12C04_XA_21-x-GMR_32A11_XD_01	Minor non-CX and VNC exp; a,b or both	§	this study
			SS04764		BJD_109E09_BB_21-x-GMR_32A11_AV_01	Plus non-CX, some VNC exp; a, b or both; †	§	this study
			SS04804		BJD_113B04_BB_21-x-GMR_32A11_AV_01	Plus FB, EB, some VNC exp; a,b or both	§	this study
EB	ER1_b		SS65915	1294082002, 1291099014	GMR_12C04_BB_21-x-BJD_114C05_AV_01	Minor non-CX exp; †	§	this study
			SS00057		GMR_12C04_XA_21-x-GMR_32A11_XD_01	Minor non-CX and VNC exp; a,b or both	§	this study
			SS04764		BJD_109E09_BB_21-x-GMR_32A11_AV_01	Plus non-CX, some VNC exp; a, b or both; †	§	this study
			SS04804		BJD_113B04_BB_21-x-GMR_32A11_AV_01	Plus FB, EB, some VNC exp; a,b or both	§	this study
EB	ER2_a		SS04772	1106180107, 1167563121	BJD_109H05_BB_21-x-GMR_11C05_AV_01	ER2_a +/or_b +/or_d; minor non-CX; some VNC exp	§	this study
EB	ER2_b		SS04772	1229369776, 5813077556	BJD_109H05_BB_21-x-GMR_11C05_AV_01	ER2_a +/or_b +/or_d; minor non-CX; some VNC exp	§	this study
EB	ER2_c		SS62792	5813048896, 1167904437	GMR_cupcake_BB_37-x-BJD_102H07_AV_01	Some VNC exp	§	this study
			SS62789		GMR_cupcake_BB_21-x-GMR_33B06_AV_01	Plus EB ring, probably ER4m; plus non-CX cells	§	this study
EB	ER2_d		SS04772	1198943369, 1168249921	BJD_109H05_BB_21-x-GMR_11C05_AV_01	ER2_a +/or_b +/or_d; minor non-CX; some VNC exp	§	this study
EB	ER3		SS59574		BJD_114C05_BB_21-x-GMR_12G08_AV_01		§	this study
EB	ER3a_a		SS59119	5812984024, 1262105575	GMR_32A11_BB_21-x-GMR_14G08_AV_01	Best guess ER3a_a&d; plus non-CX and VNC exp	§	this study
EB	ER3a_b		SS03944	1231675708, 1261772956	GMR_31A10_XA_21-x-GMR_81D02_AV_01	Some VNC exp	§	this study
			SS59281		BJD_108F01_BB_21-x-GMR_12G08_AV_01	Some VNC exp; †	§	this study
			SS59555		BJD_103F08_BB_21-x-GMR_12G08_AV_01	ER3a_b&d, best guess	§	this study
EB	ER3a_c		SS79618	1261768644, 1169260589	GMR_75B09_BB_37-x-BJD_124F06_AV_01	Poss also ER3a_b; †	§	this study
EB	ER3a_d		SS04710	1262101350, 1261773286	BJD_103F08_BB_21-x-GMR_53H08_AV_01		§	this study
			SS59119		GMR_32A11_BB_21-x-GMR_14G08_AV_01	Best guess ER3a_a&d; plus non-CX and VNC exp	§	this study
			SS59555		BJD_103F08_BB_21-x-GMR_12G08_AV_01	ER3a_b&d, best guess	§	this study
EB	ER3d_a		SS79782	1261423370, 1261086734	GMR_20F06_BB_21-x-GMR_75B09_AV_01	ER3d_a fits IS well, less well for SS but still best fit; †	§	this study
			SS79886		GMR_47F07_XA_21-x-GMR_95C12_AV_01	†	§	this study
			SS04815		BJD_115F01_BB_21-x-BJD_100D05_AV_01			this study
EB	ER3d_b		SS79745	1261773414, 1261768859	BJD_110G06_BB_21-x-GMR_93G06_AV_01	ER3d_b,c,d; minimal VNC exp; †	§	this study
			SS79837		GMR_49A11_BB_21-x-GMR_95C12_AV_01	ER3d_b +/- _c +/- _d; minimal VNC exp; †	§	this study
EB	ER3d_c		SS79884	1261419142, 1261423444	GMR_47F07_XA_21-x-BJD_126E12_AV_01	Couple ER3d_b and _d coincide with microglomeruli in LT, most don't; weak, minimal VNC exp; †	§	this study
			SS79676		BJD_101B07_BB_21-x-GMR_95C12_AV_01	Plus non-CX; minor VNC exp; †	§	this study
			SS79745		BJD_110G06_BB_21-x-GMR_93G06_AV_01	ER3d_b +/- _c +/- _d; minimal VNC exp; †	§	this study
			SS79837		GMR_49A11_BB_21-x-GMR_95C12_AV_01	ER3d_b +/- _c +/- _d; minimal VNC exp; †	§	this study
EB	ER3d_d		SS79745	1292121433, 1261432168	BJD_110G06_BB_21-x-GMR_93G06_AV_01	ER3d_b +/- _c +/- _d; minimal VNC exp; †	§	this study
			SS79886		GMR_47F07_XA_21-x-GMR_95C12_AV_01	ER3d_b +/- _c +/- _d; minimal VNC exp	§	this study
			SS79837		GMR_49A11_BB_21-x-GMR_95C12_AV_01	ER3d_b +/- _c +/- _d; minimal VNC exp; †	§	this study
EB	ER3p_a		SS67611	1322811240, 1229288307	BJD_116F08_BB_21-x-GMR_75H04_AV_01	Likely both ER3p_a & b to cover EB and glomeruli in all brains; weak FB6T, 6T in MCFO; minor VNC exp; †	§	this study
			SS17020		GMR_10E07_XA_21-x-BJD_125G03_AV_01	ER3p_a, _b; plus EB, OL, VNC exp	§	this study
EB	ER3p_b		SS67611	1291366237, 1323156554	BJD_116F08_BB_21-x-GMR_75H04_AV_01	Likely both ER3p_a & b to cover EB and glomeruli in all brains; weak FB6T, 6T in MCFO; minor VNC exp; †	§	this study
			SS17020		GMR_10E07_XA_21-x-BJD_125G03_AV_01	ER3p_a, _b; plus EB, OL, VNC exp	§	this study
EB	ER4d		SS39836	1167300194, 1513674176	GMR_11F03_BB_21-x-GMR_40D05_AV_01		§	this study
			SS39835		BJD_125G03_BB_21-x-GMR_40D05_AV_01		§	this study
EB	ER4m		SS41209	5813050767, 1167645442	BJD_114C05_BB_21-x-GMR_58H05_AV_01		§	this study
			SS78657		BJD_112E04_BB_21-x-GMR_55D12_AV_01	†	§	this study
			SS78687		BJD_122G01_BB_21-x-GMR_55D12_AV_01			this study
EB	ER5		SS41262	1231066662, 5812979604	GMR_15A05_XA_21-x-BJD_125F05_AV_01		§	this study
			SS56094		GMR_58H05_BB_70-x-GMR_38H02_AV_01	Some VNC exp	§	this study
			SS53771		GMR_15A05_XA_21-x-BJD_126E12_AV_01			this study
			SS00070		GMR_15A05_XA_21-x-GMR_48H04_XD_01			this study
EB	ER6		SS58833	1324430237, 5812983734	GMR_18A05_BB_21-x-BJD_123A02_AV_01	Minimal VNC exp	§	this study
			SS58778		BJD_109A06_BB_21-x-GMR_21C01_XD_01	Minimal VNC exp; †	§	this study
FB	dFB tangential		SS53655		GMR_72G06_BB_37-x-GMR_84C10_AV_01			this study
	dFB tangential		SS55832		BJD_105A09_BB_21-x-GMR_84C10_AV_01			this study
	dFB tangential		SS55868		BJD_128H03_BB_21-x-GMR_84C10_AV_01			this study
	dFB tangential		SS54320		BJD_125G09_BB_21-x-GMR_23E10_AV_01_2			this study
	dFB tangential		SS55859		BJD_125G09_BB_21-x-GMR_84C10_AV_01			this study
	dFB tangential		SS56338		GMR_84C10_BB_04-x-GMR_72G06_AV_01			this study
SMP	SMP249		SS93799		BJD_129A10_BB_21-x-GMR_53G06_AV_01		§§	this study
			SS94414		BJD_111C04_BB_21-x-GMR_53G06_AV_01		§§	this study
	SMP368		SS74918		BJD_128B05_BB_21-x-BJD_122B05_AV_01		§§	this study
			SS74944		GMR_94B04_BB_21-x-BJD_122B05_AV_01		§§	this study
	SMP531		SS79089		BJD_116H11_BB_21-x-GMR_60H09_AV_01		§§	this study
