# Supplementary material for: Cell type-specific driver lines targeting the Drosophila central complex and their use to investigate neuropeptide expression and sleep regulation
Source: eLife. 2025 Apr 17;14:RP104764. doi: 10.7554/eLife.104764 (PMC12005719; doi:10.7554/eLife.104764)
Supplement: Figure 9—source data 1. [file elife-104764-fig9-data1.xlsx]

## Sheet: Sheet1
Structure	Cell type	GAL4 line number	NT prediction based on EASI-FISH	EASI-FISH probe sets used	NP prediction based on EASI-FISH
PB	PFNp+m	SS00191	ChAT	1,2,4	Mip
PB	PFNd	SS52669	ChAT	1	Dh44, Nplp1
PB	PFNv	SS52577	ChAT	1,2,4	Dh44
PB	PEN_a(PEN1)	SS62862	ChAT	1,2,4	Dh44, FMRFa, Spab
PB	PEN_b(PEN2)	SS02232	ChAT	1,2,5
PB	PEG	SS02191	ChAT	1,2,4	Spab
PB	EPG	SS00090	ChAT	1	Spab
PB	EPGt	SS50576	ChAT	1	Spab
PB	PFGs	SS52547	Tdc2	1,2,3	Mip, Dh31
PB	PFGs	SS62596	Tdc2	1,2,3	Mip, Dh31
PB	PFL1/PFLC	SS47735	ChAT	1,5
PB	PFL2	SS82331	Tdc2	1,2,4	Spab, SIFa
PB	LPsP	SS52578	vGlut; ple and SerT	1,5
PB	P6-8P9	SS00189	vGlut	1
PB	Delta7	SS52313	vGlut, SerT	1,2	Proc
PB	P1-9	SS56247	vGlut	1,5	Proc
PB	IbSpsP	SS04778	ChAT	1
NO	LNOa (was L-NA)	SS47406	vGlut	1	Nplp1
NO	LNOa (was L-NA)	SS47432	vGlut	1
NO	LCNOpm	SS42273	vGlut	1
NO	LCNOp/ LCNp	SS46525	vGlut	1	Nplp1
NO	LNO1 (was L-N)	SS95213	Gad1	1
AB	vDeltaA_a	SS02718	ChAT	1,5
AB	SA1_b	SS50510	vGlut	1
FB	hDeltaB	SS64527	ChAT	1,5
FB	hDeltaC	SS96938	ChAT, SerT	1,2,3,5	none detected
FB	hDeltaD	SS00045	ChAT	1,4,5	Dh44, Tk, Spab
FB	hDeltaD	SS64505	ChAT	1,2,3,5	Dh44, Tk, Spab
FB	hDeltaE	SS90984	ChAT	1,2,3	Dh44, Tk, Spab, SIFa
FB	hDeltaF	SS53683	ChAT	1,2,3	none detected
FB	hDeltaH	SS60474	ChAT	1	Tk, Spab
FB	hDeltaI	SS60919	ChAT	1	AstA
FB	hDeltaI	SS63547	ChAT	1,2,5
FB	hDeltaK	SS63089	ChAT		AstA, NPF, AstC
FB	hDeltaK	SS54676	ChAT	1,2,5	AstA, NPF (AstC not tested)
FB	hDeltaM	SS59766	ChAT	1
FB	vDeltaA_b	SS02718	ChAT	1,5
FB	vDeltaB	SS00266	ChAT	1,5	sNPF
FB	vDeltaC	SS00268	ChAT	1,2,3	sNPF, Dh31
FB	vDeltaD	SS60482	ChAT	1,2,3,5	Dh31, sNPF
FB	vDeltaD	SS02951	ChAT	1,2,4	Dh31, sNPF
FB	vDeltaE	SS02951	ChAT	1,2,4	Dh31, sNPF
FB	vDeltaH	SS60493	ChAT	1
FB	vDeltaK	SS60427	ChAT	1,5
FB	vDeltaM	SS00281	ChAT	1,3,5	Mip, Dh44
FB	FR1	SS60081	ChAT	1,2,4	sNPF
FB	FC1	SS59799	ChAT	1,2,4
FB	FC3	SS62856	ChAT, SerT	1,2,4
FB	FB1A	SS59689	vGlut	1,5	Nplp1
FB	FB1A	SS75852	vGlut	1,5	Nplp1
FB	FB1B	SS59684	vGlut	1,5	Nplp1
FB	FB1C	SS63934	ple	1,2,5	Dh44, Nplp1
FB	FB1D	SS59709	vGlut, ChAT	1,2,4,5	Mip
FB	FB1F	SS59684	vGlut	1,5	Nplp1
FB	FB1G	SS66114	ChAT	1,5	Spab, Nplp1
FB	FB2A	SS70302	ple	1,2,3
FB	FB2B_a	SS62175	vGlut, Tdc2, SerT	1,3,5	Dh44, Proc
FB	FB2B_b	SS62175	vGlut, Tdc2, SerT	1,3,5	Dh44, Proc
FB	FB2C	SS62473	vGlut	1	Nplp1
FB	FB2E	SS95726	vGlut	1	Mip, Tk
FB	FB2F_a	SS02916	vGlut	1,5	Dh31
FB	FB2F_a	SS93973	vGlut	1
FB	FB2G_b	SS94479	vGlut	1,5	Nplp1, Spab
FB	FB2H_a	SS60877	vGlut	1
FB	FB2H_a	SS93973	vGlut	1
FB	FB2H_b	SS60877	vGlut	1
FB	FB2I_a	SS94571	vGlut	1,5	Mip, Tk
FB	FB2I_a	SS75929	vGlut	1,5	Mip, Tk
FB	FB2I_a	SS56319	vGlut	1	Mip, Tk
FB	FB2I_b	SS94571	vGlut	1,5	Mip, Tk
FB	FB2I_b	SS56319	vGlut	1	Mip, Tk
FB	FB2J	SS93973	vGlut	1
FB	FB2J	SS60877	vGlut	1	Spab
FB	FB3A	SS94879	vGlut	1	Nplp1
FB	FB3A	SS61532			Dh31, Nplp1, Proc
FB	FB3C	SS65383	Gad1	1	Dh31, Nplp1
FB	FB3C	SS75731	Gad1	1	Dh31, Nplp1
FB	FB3D	SS62977	vGlut	1,2,3	Nplp1, Dh31
FB	FB4A	SS66578	vGlut	1	Dh31
FB	FB4A	SS72322			none detected
FB	FB4B	SS60112	vGlut	1	Dh31
FB	FB4C	SS94615	vGlut	1
FB	FB4D	SS66526	vGlut	1	Nplp1
FB	FB4D	SS02752	vGlut	1	Nplp1
FB	FB4E	SS62506	vGlut	1	Dh31, Nplp1
FB	FB4G	SS61532			Dh31, Nplp1, Proc
FB	FB4J	SS02752	vGlut	1	Nplp1
FB	FB4K	SS66508	vGlut, ChAT	1	Nplp1, Proc
FB	FB4L	SS61133	ple, Tdc2	1,2,3	AstC, Dh44, SIFa, Ms
FB	FB4M	SS67580	ple, SerT	1,2,3
FB	FB4N	SS66004	vGlut	1	Nplp1
FB	FB4O	SS91010	vGlut	1	Tk, Dh31
FB	FB4P_b	SS67631	vGlut	1	Dh31, Tk, Spab
FB	FB4P_b	SS60306	vGlut	1	Dh31, Tk, Proc
FB	FB4Q_b	SS48762	vGlut	1
FB	FB4R	SS48762	vGlut	1
FB	FB4R	SS61448	vGlut	1
FB	FB4R	SS62766	vGlut	1
FB	FB4R	SS91010	vGlut	1	Tk, Dh31
FB	FB4X	SS70711	vGlut	1	Nplp1
FB	FB4Y	SS93987	SerT	1,2,3	Spab
FB	FB4Z	SS63390	vGlut	1	Dh44 Ms, Nplp1
FB	FB4Z	SS69089	vGlut	1	Dh44, Ms
FB	FB5AB	SS87368	ChAT	1
FB	FB5B	SS67490	vGlut	1	none detected
FB	FB5B	SS95274	vGlut	1
FB	FB5G	SS61697	vGlut	1	Spab
FB	FB5J	SS72322	none detected		none detected
FB	FB5K	SS62184	vGlut	1	Nplp1
FB	FB5L	SS62184	vGlut	1	Nplp1
FB	FB5L	SS61528	vGlut	1	Nplp1
FB	FB5M	SS95675	vGlut	1
FB	FB5N	SS70949	vGlut	1	FMRFa, Proc
FB	FB5N	SS95675	vGlut	1	FMRFa, Proc, Dh44
FB	FB5Q	SS71742	vGlut	1	Spab
FB	FB5Q	SS71803	vGlut	1	Spab
FB	FB5R	SS69215	vGlut	1	Dh44, Ms
FB	FB5T	SS61439	vGlut	1	none detected
FB	FB5U	SS69089	vGlut	1	Dh44, Ms
FB	FB6A	SS57656	vGlut, ChAT	1,5	AstC, Nplp1, Tk, Mip, Spab
FB	FB6A	SS54343	vGlut, ChAT	1	AstC, Nplp1, Spab
FB	FB6B	SS72415	vGlut	1	Nplp1, sNPF
FB	FB6H	SS95649	vGlut, ple and SerT	1,3,5
FB	FB6M	SS49931	vGlut	1	Proc
FB	FB6P	SS60140	vGlut	1
FB	FB6Q	SS95274	vGlut	1
FB	FB7A	SS55876	vGlut	1	Nplp1, Spab
FB	FB7A	SS55888	vGlut	1	Nplp1
FB	FB7A	SS55882	vGlut	1,2,3
FB	FB7B	SS67858	vGlut, ChAT, ple, SerT	1,5	Nplp1, Dh31
FB	FB7B	SS55882	vGlut	1,2,3	Nplp1, Spab
FB	FB7G	SS94527	vGlut	1
FB	FB7H	SS63542	vGlut	1	Nplp1, Proc
FB	FB7J	SS77099	vGlut	1	Nplp1, Dh44
FB	FB7L	SS61682	vGlut	1	Nplp1
FB	FB8B	SS47633	vGlut, Tdc2	1,2,3	Proc
FB	FB8B	SS47631	vGlut, Tdc2	1,2,4	Proc
FB	FB8C	SS69117	vGlut	1	Proc, AstC
FB	FB8C	SS47633	vGlut, Tdc2	1,2,3	Proc
FB	FB8D	SS92555	vGlut	1	none detected
FB	FB8F_a	SS69168	vGlut	1	Nplp1
FB	FB8F_b	SS69168	vGlut	1	Nplp1
FB	FB8H	SS75512	vGlut	1	Nplp1
FB	FB9B	SS68028	vGlut	1,2,4
EB	EL	SS00026	Tdc2, Tbh	1,2,3	SIFa, Spab
EB	EL	SS53322	Tdc2, Tbh	1,2,3	SIFa, Spab
EB	EL	SS00027	Tdc2, Tbh	1,2,3	SIFa, Spab
EB	EL	SS60093	SerT, Tdc2, Tbh	1,2,3
EB	ExR1	SS04830	ChAT	1,2	none detected
EB	ExR1	SS09135	ChAT	1,2,4
EB	ExR1	SS56803	ChAT	1	none detected
EB	ExR3	SS61641	SerT	1,2,3	NPF
EB	ExR3	SS04919	SerT	1,2,4	none detected
EB	ExR5	SS51128	vGlut	1
EB	ExR5	SS65188	vGlut	1
EB	ExR5	SS65155	vGlut	1
EB	ExR6	SS53617	vGlut	1
EB	ExR7	SS65157	ChAT	1
EB	ER3d_a	SS04815	Gad1	1
EB	ER4m	SS78687	Gad1, ple	1,2,4	Dh31
EB	ER5	SS41262	Gad1	1
EB	ER5	SS56094	Gad1	1
EB	ER5	SS53771	Gad1	1,2,4	Dh31, Nplp1 (PdfR, Dh44R2)
EB	ER5	SS00070	Gad1	1	Dh31 (PdfR). Nplp1 not tested
EB	ER6	SS58833	Gad1	1
